1 A spatiotemporal gradient of mesoderm assembly governs cell fate and morphogenesis of the early  
2 mammalian heart

3

4

5 Martin H. Dominguez<sup>1,2,3,7</sup>, Alexis Leigh Krup<sup>1,4,5</sup>, Jonathon M. Muncie<sup>1</sup>, and Benoit G.

6 Bruneau<sup>1,5,6,7</sup>

7

8

9

10

11 1. Gladstone Institutes, San Francisco, CA, USA

12 2. Department of Medicine, Division of Cardiology, University of California, San Francisco, CA, USA

13 3. Cardiovascular Institute, University of Pennsylvania, Philadelphia, PA, USA

14 4. Biomedical Sciences Graduate Program, University of California, San Francisco, CA, USA

15 5. Roddenberry Center for Stem Cell Biology and Medicine at Gladstone, San Francisco, CA, USA

16 6. Department of Pediatrics and Cardiovascular Research Institute, University of California, San

17 Francisco, San Francisco, CA, USA

18 7. Corresponding authors: [martin.dominguez@penntmedicine.upenn.edu](mailto:martin.dominguez@penntmedicine.upenn.edu),

19 [benoit.bruneau@gladstone.ucsf.edu](mailto:benoit.bruneau@gladstone.ucsf.edu)

20

21

22

23 **Abstract**

24

25 Using four-dimensional whole-embryo light sheet imaging with improved and accessible computational  
26 tools, we longitudinally reconstruct early murine cardiac development at single-cell resolution. Nascent  
27 mesoderm progenitors form opposing density and motility gradients, converting the temporal birth  
28 sequence of gastrulation into a spatial anterolateral-to-posteromedial arrangement. Migrating  
29 precardiac mesoderm doesn't strictly preserve cellular neighbor relationships; spatial patterns only  
30 become solidified as the cardiac crescent emerges. Progenitors undergo a heretofore unknown  
31 mesenchymal-to-epithelial transition, with a first heart field (FHF) ridge apposing a motile juxtacardiac  
32 field (JCF). Anchored along the ridge, the FHF epithelium rotates the JCF forward due to push-pull  
33 morphodynamics of the second heart field, which forms the nascent heart tube. In *Mesp1* mutants that  
34 fail to make a cardiac crescent, mesoderm remains highly motile but directionally incoherent, resulting  
35 in density gradient inversion. Our practicable live embryo imaging approach defines spatial origins and  
36 behaviors of cardiac progenitors, and identifies their unanticipated morphological transitions.

## 37 **Introduction**

38

39 The emergence and allocation of the progenitors of organs offers insights into the events that ensure  
40 robust morphogenesis. The developing heart is particularly sensitive to disturbed morphogenesis, as  
41 congenital heart defects occur in over 1% of live births. Understanding the stepwise allocation and  
42 assembly of cardiac precursors will provide insights into heart development and disease. Cell labeling  
43 and histological studies have shown how the heart forms from its earliest discernible stages [1–5], but  
44 individual cellular events following gastrulation remain mostly uncharacterized.

45

46 Cardiovascular progenitors emerge during gastrulation as a subset of the *Mesp1*<sup>+</sup> nascent mesoderm  
47 population, and migrate to lateral regions that will become the cardiac crescent [6–8]. Early cardiac  
48 progenitors comprise multipotent progenitor pools, the first and second heart fields (FHF and SHF), as  
49 well as a newly-classified juxta-cardiac field (JCF). The JCF contributes to epicardium and left ventricle  
50 (LV) [9,10]. Partially overlapping the JCF, the FHF contributes to atria, atroventricular canal (AVC) and  
51 left ventricle (LV) [6,11]. SHF cells contribute to the atria, right ventricle (RV), and outflow tract (OFT)  
52 [12,13].

53

54 Mouse genetics tools have led to complex lineage and clone labeling strategies, revealing that *Mesp1*<sup>+</sup>  
55 progenitors have rudimentary assignments to final cardiac structures, even prior to formation of the  
56 heart fields. Notably, both temporal and spatial restriction of the *Mesp1*<sup>+</sup> progenitor pool have been  
57 shown [6,7,14]. However, evidence that may unify our understanding of early specification in both  
58 temporal and spatial domains, is incomplete. Moreover, due to the complex morphological processes  
59 that underpin heart formation, concretely linking early progenitors to their progeny structures requires  
60 examination at greater temporal resolution than lineage tracing alone can afford.

61

62 Live imaging of avian cardiogenesis has brought insights in early cardiac morphogenesis, exploiting  
63 the relative accessibility of such embryos for visualization and micro-manipulation [2,15–17]. Imaging  
64 studies of early mouse development, however, have grown at a relatively slower pace, owing to the  
65 fragility and limited longevity of *ex vivo* embryo culture [18–21]. Recent studies have examined  
66 gastrulation [22] and cardiogenesis [23] in the mouse, but are limited to examining only a few cells at a  
67 time.

68  
69 Light sheet fluorescence microscopy (LSFM) is well suited to morphogenetic studies of mouse  
70 development [24–27], though most *in toto* embryo imaging has been performed on highly-specialized,  
71 custom-build instruments. While computational analysis of large-scale LSFM data is now possible [27–  
72 30], most existing software applications are designed with the same specialization as the custom  
73 microscopes with which they are paired.

74  
75 Overcoming these roadblocks, we performed comprehensive whole-embryo analyses to examine early  
76 cardiac progenitors and their emergence from *Mesp1*<sup>+</sup> mesoderm. We combined a widely-available  
77 LSFM setup and murine *ex vivo* embryo culture (Fig. 1A), integrating data from fluorescent reporters  
78 for both *Mesp1* lineage and the *Smarcd3* “F6” enhancer, the latter being the earliest known cardiac-  
79 specific identifier [6]. Furthermore, we generated new computational tools and improved existing ones,  
80 aiming to enhance data collection, image processing, and computational analysis of such large-scale  
81 data, and to help democratize the use of live embryo imaging.

82  
83 By tracking cardiogenesis at single cell resolution with retrospective *in silico* labeling, our work reveals  
84 how cardiac regional fate is intimately tied to the temporal birth and migration sequence of cardiac  
85 progenitors. Additionally, we highlight the morphological formation of cardiac epithelium, uncovering  
86 region-specific migration and movement behaviors that ultimately shape and sculpt the early heart.

87

88  
89  
90  
91  
92  
93  
94  
95  
96  
97  
98  
99  
100  
101  
102  
103  
104  
105  
106  
107  
108  
109  
110  
111  
112

## Results

### An improved computational workflow for in toto mouse embryogenesis by multi-view LSFM

Cardiac fate allocation occurs early in gastrulating embryos [6,7]. We explored means of live investigation using fluorescent reporter mice that may uncover mechanisms underlying the genesis of early cardiac progenitors and their allocation to the heart tube.

Recently, McDole et al. described a comprehensive, whole-embryo imaging workflow of mouse post-implantation development [29]. The powerful LSFM microscope utilized in that study provides unparalleled imaging, but assembly time can range from weeks to months, the instrument occupies an entire room, and it requires dedicated specialists to operate. As an alternative, cost-effective but advanced commercial LSFM setups such as the Zeiss Lightsheet Z.1 are becoming widely available. To facilitate long imaging runs on our Z.1, we wrote an interactive application to perform adaptive position correction by registering sequential captures and interfacing with the microscope's software (Fig. 1A).

We empirically determined that 2-3 specimen views acquired at 6-minute intervals would produce an acceptable balance of data return and phototoxicity, and sought a compatible computational pipeline for downstream analysis. Raw data amounts to 2-4 terabytes per experiment, depending on number of views, channels, and duration. A true in toto approach then “fuses” those views to form a single comprehensive image volume of the entire specimen, with deblurring methods applied in the process [31].

113 One such method, multiview deconvolution, becomes computationally efficient with 4 or more views  
114 [32]. As we utilize only 2-3 oblique views of each embryo, we crafted an open-source single-view  
115 deconvolution and fusion workflow (Fig. 1B), avoiding iterative methods due to their staggering  
116 processing overhead with this type of data. Our macro-based application employs closed-form  
117 deconvolution [33] in batch (using theoretical PSFs), offering further enhancement with Fiji's  
118 background subtraction algorithm [34]. We next employed BigStitcher [28], a user-friendly tool for  
119 registering (i.e. aligning) and fusing (consolidating) multiview LSFM datasets in 4d (Fig. 1C).

120  
121 Within BigStitcher, we carefully examined content-based fusion, a method that vastly outperforms  
122 mean fusion in terms of result quality (Fig. S1A). It does this by estimating regions of entropy (i.e.  
123 noise) in each view, and weighting the output to favor entropy-low regions. However, content-based  
124 fusion is impractical or even unattainable with large datasets due to its memory and CPU  
125 consumption. Since the weight images for each view are, in effect, compacted summaries of the  
126 content within the image, we reasoned that downscaling prior to entropy calculation may have little  
127 effect on either the weight images or the fusion results. Indeed, 2X or 4X downscaling (prior to entropy  
128 calculation) produced nearly identical results across a wide range of sample datasets, but with  
129 markedly decreased CPU time and memory usage (Fig. S1A'-A''). We named the optimized algorithm  
130 "lightweight" content-based fusion (Fig. 1C).

131  
132 After multiple views are consolidated into a single volume for each channel and timepoint, tracking is  
133 used to estimate each cell's position in space and time. We started with open source TGMM 2.0 [29],  
134 adding several enhancements to tracking accuracy and computational efficiency (Fig. S1B). We first  
135 improved TGMM's segmentation by employing a dynamic background subtraction routine, utilizing  
136 image features (derived from Gaussian blur filtering) to identify background, rather than by subtracting  
137 static pixel values homogeneously (Fig. S1C-D'). Next, we optimized the main tracking loop to  
138 minimize repeat calls to hierarchical segmentation by caching their results. Finally, we re-wrote the

139 division detection machine learning classifier to score combinatorial division trios (mother-daughter-  
140 daughter) near each cell birth, choosing the best trio for the final solution (Fig. S1H-I). With its ultimate  
141 iteration designated v2.5, Forked Tracking with Gaussian Mixture Models (F-TGMM) represents a  
142 stabler and more accurate tracking package (Fig. S1G) that runs 30% faster than TGMM 2.0 (Fig.  
143 S1B').

144

145 TGMM data can be analyzed as raw tracks (Fig. 1E), which spuriously and stochastically terminate  
146 owing to imperfect linkage across time (Fig. S1E-G). Alternatively, tracks can be extended in time to  
147 create a morphodynamic overview of the dataset, using a package called statistical vector flow (SVF,  
148 Fig. 1E) [29]. The open source Fiji plugin, MaMuT, is used for visualization of raw tracks and SVF  
149 results [30]. We updated SVF for use with Python 3 (Python 2.x is no longer maintained), and  
150 enhanced MaMuT for 3d viewing of large datasets, and for displaying cell vector flow (Fig. 1E). Lastly,  
151 we wrote a collection of scripts for MaMuT dataset manipulation (Fig. 1E), which perform a variety of  
152 tasks that: selectively label or color embryo regions/tissues, subset and concatenate datasets, export  
153 track data for statistical analysis, filter or exclude tracks by cell or track features, and more.

154

155 Overall, these computational tools facilitate collection, analysis, and visualization of in toto live imaging  
156 data. We applied this comprehensive package to the investigation of mesoderm migration and early  
157 cardiac morphogenesis, though it could be used in a variety of applications. All are open source and  
158 portable, and compatible with contemporary hardware and software.

159

### 160 A spatiotemporal gradient of mesoderm accumulation

161 After finalizing the computational toolbox for live imaging of mouse embryos, we examined behavior  
162 during and immediately following gastrulation as cardiac progenitors are born. Using *Mesp1* lineage  
163 reporter mice, we began in toto experiments at the mid streak (E6.5) stage, when only a few

164 progenitors have arrived in the mesoderm layer (Fig. 2A and Video S1). Across all embryos studied,  
165 we noticed stereotypical collective migration of the mesoderm, yet stochastic individual cell behaviors.  
166  
167 Generally, *Mesp1* progeny filled the mesoderm layer in an orderly spatiotemporal pattern. Migrating  
168 from posterior regions, the nascent progenitors settled first in anterior and proximal locations, followed  
169 by progressively posterior and distal locations (Fig. 2B-C). We assigned 9 bins to the final destinations  
170 of the cells (after each 12-hour sequence), and analyzed the raw tracks for cell density, motility, and  
171 birthdate (Fig. 2B'). This showed that cells migrating within the posterior-distal locations were less  
172 dense, more motile, and born later than cells in anterior-proximal locations. In flat disc embryos such  
173 as those of most amniotes, this would be akin to an anterolateral-to-posteromedial sequence of  
174 mesoderm filling, guided by a concomitant density gradient.

175  
176 SVF-processed tracks also demonstrated similar opposing gradients of birthdate and velocity (Fig.  
177 2C). Quantitative analysis showed that extraembryonic mesoderm cells migrated more slowly than  
178 embryonic mesoderm cells (Fig. 2C'), consistent with prior findings [22]. However, as embryonic cells  
179 arrived in their positions and the mesoderm layer filled, they slowed to a velocity comparable to that of  
180 extraembryonic cells (Fig. 2C').

181  
182 Holistically, this process creates a dense pileup of slowing cells in anterior and proximal regions,  
183 juxtaposed with fast-moving sparser cells in distal and posterior regions that are still accumulating at  
184 their destinations. Thus, the embryo grows by posterior and distal extension (Fig. 2D', S2B-C), similar  
185 to a traffic jam propagating along a highway, further and further from its origin. Embryos at 6.75 (late  
186 streak) exhibited similar opposing gradients of motility and density (Fig. S2D-F'), as nascent  
187 mesoderm is still being born at this stage. However, at E7.0, few new cells were born as embryos  
188 underwent ventral deformation and head folding (Fig. S2E).

189



190 Although the filling of mesoderm was orderly and stereotypical, we noticed that individual cell  
191 movements were quite chaotic during migration. This behavior has been observed qualitatively before  
192 [25,26,29], but our fluorescent reporters are uniquely suited for quantitative large-scale analysis of this  
193 phenomenon. Broadly speaking, gene expression and cell fate are patterned within the posterior  
194 epiblast and primitive streak [14,35], such that mesoderm and endoderm progenitors arise from  
195 distinct molecular and spatiotemporal regions. Yet, if an inflexible, precise proto-map within the  
196 mesoderm domain occurs prior to gastrulation, progenitors may be expected to migrate with mostly  
197 linear motion in order to preserve cell neighbor relationships and therefore the spatial map, as  
198 suggested by prior studies [14,22]. We observed the contrary.

199  
200 Having manually tracked a large cohort of dividing cells during mesoderm assembly, we studied the  
201 migratory patterns of daughter cells (Fig. 2E-F), which necessarily share an ancestral site of origin in  
202 the primitive streak. To our surprise, daughter cells underwent substantial separation following division,  
203 up to 75 $\mu$ m (or 30% of total embryo length) in two hours (examples in Fig. 2E-F, 2I). When mother-  
204 daughter and daughter-daughter behavior were compared across stages, the strong separating  
205 movements of daughter cells declined as mesoderm assembly proceeded (Fig. 2I). By E7.0, daughters  
206 mostly remained in close proximity.

207  
208 Similarly, we examined the crossing behavior of migrating cells during gastrulation using F-TGMM  
209 tracks, to determine the extent of mixing of unrelated cells. We observed frequent position swaps of  
210 co-migrating cells (Fig. 2G). By summarizing position swaps across two axes in various embryo  
211 regions, we again found that tracks cross each another less frequently with incrementing embryo stage  
212 (Fig. 2H). Comparing track pairs between E6.5 and E6.75 embryos, we likewise found tighter  
213 correlation of start and end positions in older embryos and in proximal (versus distal) locations (Fig.  
214 S2H-I').

215

216 Collectively, these findings demonstrate that mesoderm assembly occurs in a stereotypical sequence  
217 from anterior-proximal to posterior-distal, guided by opposing gradients of density and cell motility.  
218 Moreover, considerable cell mixing occurs during this process, evidenced by the lack of preservation of  
219 cell neighbor relationships, until gastrulation finishes and positional settlement occurs.

220

#### 221 Birth of the *Smarcd3*-F6<sup>+</sup> cardiac progenitors

222 Next, we examined embryos bearing the *Smarcd3*-F6-nGFP reporter, which utilizes a *cis* enhancer of  
223 BAF complex member *Smarcd3* / Baf60c termed “F6” that becomes active at E6.75 in cardiac  
224 precursors [6].

225

226 We empirically determined that nascent mesoderm at E6.75 could be grossly divided into two  
227 compartments on the basis of staining for either MSX1 or FOXC2 (Fig. 3A-B'), representing proximal  
228 and extraembryonic versus distal embryonic mesoderm, respectively. These populations likely  
229 correspond to distinct “destination cell types” in recent single cell RNAseq analysis of embryos at this  
230 stage [36], though they have not been spatially resolved heretofore. At E6.75, the earliest *Smarcd3*-F6<sup>+</sup>  
231 progenitors definitively overlapped with the MSX1<sup>+</sup> population (Fig. 3B-B'), but were distinct from cells  
232 expressing FOXC2 (Fig. 3A-A'). Since the *Smarcd3*-F6 lineage populates multiple tissues within all  
233 cardiac chambers [6], we next asked whether the *Smarcd3*-F6<sup>+</sup>/MSX1<sup>+</sup> population is static or dynamic  
234 over time.

235

236 After E7.0, when the reporter was sufficiently bright for live imaging, an ongoing increase in *Smarcd3*-  
237 F6<sup>+</sup> activity was apparent over the subsequent 12 hours (Fig. 3C, Video S2). However, dramatic ventral  
238 folding of the embryo become a moving target and obscured expression changes. Lateral mesoderm,  
239 especially, underwent greater apparent displacement than any other region during the sequence (Fig.  
240 3E). We employed forward and backward propagation in SVF to mark F6<sup>+</sup> tracks at the start (F6<sup>+</sup> early  
241 cohort) and end (F6<sup>+</sup> late cohort) of the sequence, respectively (Fig. 3D). Unexpectedly, we found that

242 a large swath of mesoderm—much larger than the F6<sup>+</sup> domain at E6.75—carried a cardiac fate. Thus,  
243 the F6<sup>+</sup> domain expands distally (i.e. medially) and posteriorly as the reporter turns on, ultimately  
244 enveloping the *Smarcd3*-F6/FOXC2<sup>+</sup> domain seen at E6.75 (Fig. 3A). Indeed, the region with late  
245 reporter onset actually houses the majority of future cardiac progenitors (Fig. 3D).

246

247 A careful review of SVF tracks revealed that the early F6<sup>+</sup> cohort had much greater migratory diversity  
248 than the late F6<sup>+</sup> cohort, the latter of which moved outwardly and anteriorly following the overall  
249 expansion and ventral folding of the embryo (Fig. 3F). By contrast, we noted at least three patterns of  
250 early F6<sup>+</sup> migration, including cells that: 1) migrated into extraembryonic structures; 2) traveled mostly  
251 posteriorly within the presumptive JCF space, laying on top of the forming crescent; and 3) followed  
252 the forming crescent (similar to the late F6<sup>+</sup> cohort) anteriorly. Lastly, we noted that the anterior midline  
253 in the mouse was breached around E7.0 by lateral mesoderm bilaterally, and that these incursions  
254 across the midline were composed of both early and late F6<sup>+</sup> cohorts (Fig. 3G).

255

256 When slightly later stage embryos (E7.0-E7.25) were examined, similar results were obtained (Fig.  
257 S3A-E), though the early F6<sup>+</sup> cohort had already incorporated more distal and posterior regions by this  
258 point. Interestingly, expansion of F6 into more distal regions by E7.25 was paralleled by recession of  
259 FOXC2 and onset of ISL1 expression (Fig. S3F-F"). This suggests that distally (i.e. medially), the late  
260 F6<sup>+</sup> cohort may be associated with SHF fate.

261

262 To concretely examine cell fate of the two cohorts, we used *Smarcd3*-F6-CreERT2 mice to lineage  
263 label progenitors at timepoints defined by tamoxifen administration. When tamoxifen was given at E5.5  
264 or E6.5, we noted relatively similar contributions to myocardial structures, but with far fewer cells  
265 labeled at E5.5 (Fig. 3H-H"), consistent with the known onset of the reporter after E6.5. More  
266 interestingly, we noted a shift in the fates of E7.5-labeled cells toward SHF and outflow structures (Fig.  
267 3H").

268

269 While differential temporal fate of cardiac progenitors has been shown previously [7,14], it is significant  
270 here for two reasons. First, the graded onset of the F6 reporter (Fig. 3D) almost perfectly parallels the  
271 graded assembly of mesoderm by birthdate (Fig. 2C-D), except that it occurs 6-12 hours later. This  
272 parallel is further supported by the strikingly similar results of temporally-labeled *Mesp1* progeny [7]  
273 versus F6 progeny (Fig. 3H-H''): early *Mesp1*<sup>+</sup> and F6<sup>+</sup> cells contribute preferentially to LV,  
274 proepicardium, and AVC; late *Mesp1*<sup>+</sup> and F6<sup>+</sup> cells uniquely contribute to RV, OFT and atria. Second,  
275 the positions and marker co-expression of the two F6<sup>+</sup> cohorts (as shown here) reveal patterning of the  
276 early cardiac crescent: anterolateral *MSX1*<sup>+</sup> cells give rise to LV, proepicardium, and AVC, whereas  
277 posteromedial *FOXC2*<sup>+</sup> cells, consistent with their apparent conversion to *ISL1* expression (Fig. S3F-  
278 F''), contribute to RV and OFT. However, because the gradients of mesoderm accumulation and  
279 cardiac specification run diagonally in the embryo, spatially resolving late F6<sup>+</sup> regions patterned for RV,  
280 OFT, or atria requires additional information [5,14], or tracking of later stage embryos.

281

### 282 Mesenchymal-epithelial transition of the cardiac crescent

283 The next steps of cardiogenesis are not well studied in mammals, as tools for labeling the progenitors  
284 of interest and for examining their morphogenesis are scarce. Reporter mice such as those based on  
285 *Nkx2-5*, for example, initiate visible expression too late (E7.75 and beyond) to capture these stages  
286 [23]. Therefore, we again took advantage of *Smarcd3*-F6-nGFP reporter embryos from E7.25 to E7.75  
287 to understand how the early crescent becomes suitable for forming a closed tube. During and after  
288 these stages, the pre-cardiac structures begin to take recognizable form [23], permitting annotation of  
289 patterned features and cell fates (Fig. 4A-B).

290

291 Despite the gross structural change of the cardiac crescent, the spatial expression of early cardiac-  
292 specifying transcription factors *ISL1* and *MEF2C* remained static between E7.25 and E7.75 (Fig. S4A-  
293 C''). At first, the morphological changes (Fig. S4C' and SC'' vs. S4A' and SA'', Video S3) appeared

294 consistent with splitting of the mesoderm into splanchnic and somatic layers. However, in labeling by  
295 F6 (Fig. S4C-C'' and 4A-A') to reveal cardiac progenitor nuclei, we found a number of unexpected  
296 behaviors. First, the mesoderm simultaneously partitioned into three progeny compartments (Fig. 4A'):  
297 prospective endocardium, prospective myocardium, and prospective pericardium (i.e. somatic  
298 mesoderm). Second, the process appeared more complex than pure bisection (or trisection) of the  
299 mesodermal mesenchyme; the prospective myocardium flattened into a continuous single cell layer  
300 and expanded outwardly, stretching into the forming foregut pocket (Fig. S4C-C'' and 4A-A').

301

302 Next, we used a whole-cell tdTomato *Mesp1* lineage reporter to quantify the cells' shape and size  
303 changes. Consistent with a transformation from dense mesenchyme to planar sheet, cell volume  
304 increased, cell density declined, and dorsal-ventral depth of the prospective myocardium decreased  
305 (Fig. 4C). Despite the subtle complexity, the morphological changes we observed (Figs. 4A, S4D, and  
306 S5A) are reminiscent of a mesenchymal-epithelial transition (MET), a critical morphodynamic step in  
307 numerous other developmental processes [37].

308

309 To investigate the possible mechanisms for a cardiac crescent MET, we analyzed single cell  
310 transcriptomes with fine temporal granularity during this process, dating from E7.5 to E8.0 [9].  
311 Although mesoderm cells clustered principally by progenitor field and not by stage (Fig. 4D), we  
312 performed pseudo-bulk comparison between the two earliest stages ("-1" and "0"), i.e. E7.5 and  
313 intermediate between E7.5 and E7.75 (Fig. 4E). In scoring gene ontology (GO) biological processes  
314 (BP) for membership by differentially-expressed transcripts (Fig. 4F), we noted that the term "positive  
315 regulation of epithelial to mesenchymal (EMT) transition" was the second-most significant (Fig. 4F').  
316 Almost universally, EMT regulatory transcription factors were downregulated at stage "0" compared  
317 with stage "-1," and a panel of notable members—*Foxc1*, *Twist1*, and *Snai1*—showed clear temporal  
318 declines across the dataset (Fig. 4G). *Foxc1* was only present in the *Foxc2*<sup>+</sup> population, whereas  
319 *Twist1* and *Snai1* were present in both mesodermal progenitor pools but declined during differentiation

320 (Fig. 4H). These results identify a reversal of the transcriptional pathways taken for EMT, via down-  
321 regulation of positive EMT regulators, as a possible mechanism for cardiac crescent MET.

322

### 323 Movement of cell populations during crescent MET

324 Because the observed MET occurs coincidentally with reshaping of the cardiac progenitor fields,  
325 together with spatial segregation of lineages (FHF, SHF, pericardium, endocardium, etc.), we next  
326 asked if we could reconstruct this process to determine patterns of cell fate and migration. With  
327 annotation guided by time-lapse LSM footage from *Mef2c*AHF lineage tracing experiments (Figs. 5B,  
328 S5B-B''), we analyzed 9 tissues by backward propagation of the *Mesp1* lineage in SVF at E7.25 –  
329 E7.5 (Figs. S5A, 5A). Interestingly, pericardium and endocardium appeared to originate from  
330 progenitors interspersed within the cardiac crescent, yet they were spatially pre-configured within the  
331 mesenchyme by dorsal-ventral depth (Fig. 5A'), consistent with morphogen transfer between primitive  
332 germ layers [38].

333

334 Next, we examined the myocardial fields, which expand considerably as they flatten into a one- or two-  
335 cell thick lamina. SVF propagation showed the myocardial fields formed a ventral ridge that extended  
336 dorsally into the deepening foregut pocket (Fig. 5C, Video S4). Although the SHF underwent greater  
337 movement, its net displacement was lower than either the JCF or FHF when corrected for endoderm  
338 deformation (Fig. 5C'), consistent with a coordination between myocardium and endoderm [16].

339

340 We next examined the JCF, which showed the greatest corrected SVF displacement of the three heart  
341 fields (Fig. 5C'). Curiously, we observed very brisk, seemingly chaotic movements (Fig. 5D and E,  
342 Video S4) within the JCF in all of our live experiments. JCF cells were *F6*<sup>+</sup>, *ISL1*<sup>-</sup>, and had varying  
343 levels of *MEF2C* (Fig. S5D), and JCF nuclei were more tangentially oriented along the crescent than  
344 FHF and SHF (cardiac crescent, "CC") nuclei (Figs. 5D' and S5C). Consistent with visual observations,  
345 JCF cells were far more motile than the relatively immobile CC cells (Fig. 5D' lower panel and 5E).

346

347 To investigate gene expression that could be responsible for this behavior, we compared the JCF and  
348 FHF (Figs. 5F-H', S5E-G) by single cell RNAseq [39]. In scoring GO BPs for membership by  
349 differentially-expressed genes between JCF and FHF (Fig. 5H), we found a number of significant  
350 terms that incorporate motility, adhesion, or migration (Fig. 5H), and plotted a collection of differentially  
351 expressed member genes (Fig. 5H'). *Nrp1*, a member of three such GO BP terms, was the most  
352 upregulated in the JCF versus FHF. *In addition*, a number of bone morphogenic protein and other  
353 matrix/guidance molecules were differentially expressed in the JCF (Fig. 5H').

354

### 355 Transformation of the epithelial cardiac crescent into the early heart tube

356 Shortly after becoming an epithelium (E7.75), cardiac progenitors undergo rapid morphogenesis to  
357 form (E8.0) and dorsally close (E8.25) the early heart tube [23]. Using in toto LSFM imaging with  
358 TGMM/SVF reconstruction at E7.75 (Fig. 6A-A'', Video S5), we observed two notable patterns of  
359 movement. First, progenitors within the dorsal aspect of the epithelial sheet lifted off the endocardial  
360 surface, causing the ventral-anterior portion of the ridge (along with the overlying JCF) to rotate  
361 posteriorly (pattern 1, arrowhead in Fig. 6A') by pivoting on FHF/JCF boundary, which acted as a  
362 morphological anchor. The JCF followed the ventral torsion of the ridge, being dragged and nearly  
363 draped around the ventral aspect of the cardiac epithelium. Second, a knob-like epithelial protrusion  
364 propagated posteriorly within the dorsal aspect of the crescent, traveling posteriorly as a wave (Fig. 6A  
365 and pattern 2, arrowheads in 6A'').

366

367 SVF reconstructions of this sequence, annotated using time lapse imaging of *Mef2c*AHF lineage  
368 tracing experiments (Fig. 5B and S5B-B''), indicated that these two patterns were features of the SHF  
369 (Fig. 6B-C). Quantitative tracking showed that SHF cells underwent much greater displacements than  
370 either JCF or FHF (Fig. 6C') during this process. Lastly, review of orthogonal SVF projections revealed  
371 the anterior- (pattern 1) and medial- (pattern 2) directed torsional motion resulted in opening and

372 closing, respectively, of the early heart tube (Fig. 6D and left panel in 6E). As the midline was reached  
373 by prospective dorsal mesocardium / dorsal closure myocardium, those patterns converged to drive  
374 the epithelial sheet anteriorly into the forming heart (Fig. 6E, right panel).

375

376 In fixed embryos labeled with MEF2C<sup>+</sup> (JCF, FHF, and SHF) and *Mef2c*AHF lineage (SHF only) cells,  
377 we found that SHF progenitors entered the forming linear heart tube (LHT) via wave-like translocation  
378 or treadmilling of the SHF epithelium through the knob-like structure (Fig. 6F', G', H', arrowheads  
379 demarcate FHF boundary, arrows point to dorsal wave). Taken together, these experiments shed light  
380 on the diverse morphodynamics of the SHF, both in space and time [40], indicating that they  
381 concurrently enact dorsal closure, formation of dorsal mesocardium, and establishment of the arterial  
382 pole (see next section).

383

#### 384 LHT closure by *Isl1*-dependent morphogenetic wave within differentiating SHF progenitors

385 Empirical attempts to characterize the SHF epithelial knob-like structure revealed that it was labeled by  
386 intermediate expression of ISL1 and NKX2-5 (Fig. S6A-A'''). By single cell RNAseq analysis, this zone  
387 (intermediate *Isl1* and *Nkx2-5*) resolves to the "Transitioning SHF CMs" cluster, for which a key marker  
388 gene was *TdGF1* (Fig. S6B-B'). The unique molecular features of the knob also include a number of  
389 extracellular signaling and cytoskeletal factors (Fig S6C-F). Future investigation into these may shed  
390 light on the dramatic morphogenetic behaviors of the knob, and formation of SHF structures.

391

392 Next, we examined *Nkx2-5* or *Isl1* mutant embryos at E8.5, when dorsal seam myocardium had  
393 reached the midline in control LHTs (Fig. S6G'', see arrowheads). The comparable region in *Nkx2-5*  
394 mutant embryos appeared disorganized, over-folded, and delayed in its approach to the midline (Fig.  
395 S6H'', see arrowheads). *Isl1* mutants, on the other hand, failed to form the knob/wave region entirely  
396 (Fig. S6I'', see arrowheads), and therefore retained an open configuration of the prospective dorsal  
397 mesocardium and aortic sac. We speculate that this is due to a paucity of SHF cells from decreased



398 proliferation in the SHF [12,41], or more likely from mis-specification of early *Foxc2*<sup>+</sup> progenitors to  
399 non-cardiac fates [42]. Indeed, LSFM analysis of later stage *Is1* KO embryos revealed unusual co-  
400 expression of FOXC2 and TNNT2 (Fig. S7A' versus S7B'), as well as complete absence of dorsal LHT  
401 closure (Fig. S7A'' versus S7B'').

402

403 Loss of *Mesp1* disrupts the density gradient that forms after gastrulation, altering mesoderm  
404 organization

405 To gain an understanding of cues that control the spatiotemporally-governed early cardiac progenitor  
406 behaviors, we studied gastrulation in *Mesp1* mutants, where early organogenesis does not occur due  
407 to specification and/or migration defects [6,8,36,43]. Although the movement behaviors of *Mesp1*  
408 knockdown cells have been studied *in vitro* [44], we exploited LSFM and our tracking workflow to  
409 better understand their actions *in vivo*.

410

411 We observed that the anterior flank of *Mesp1* KO mesoderm did not reach the anterior midline (Figs.  
412 7A-A'' versus 7B-B'', Video S6). F-TGMM tracks from these LSFM experiments were grouped/binning  
413 by their destination position along the anterior-proximal to posterior-distal filling gradient we previously  
414 determined (Fig. 7C-C''). Track birthdate and motility gradients were preserved in mutants (Fig. 7C',  
415 top and middle panel pairs), but the density gradient appeared flattened and partially inverted (Fig.  
416 7C', bottom panel row). When we examined the spatial vectors of these tracks, binning the gradient  
417 into three sections, we observed a severe defect in anterior-directed, as well as outward expansive  
418 motion (Fig. 7C''). To explore possible mechanisms for failed directional migration, we analyzed *Mesp1*  
419 KO embryos by single cell RNAseq (Krup et al., manuscript in preparation). A host of morphogens,  
420 their receptors, and downstream signaling effectors [45] are perturbed in *Mesp1*-null mesoderm  
421 progenitors. This includes *Rac1* and *Fgf* genes, which have been shown to be important for directed  
422 motility of the mesoderm [22,45].

423

424 Examination of individual tracks in *Mesp1* KO embryos revealed near absence of anterior-directed  
425 motion in the anterior, older-born cells (Fig. 7F versus 7E), whereas younger, posterior cells  
426 maintained some degree of anterior movement. This abnormal movement of older-born cells may  
427 underlie the observed density gradient inversion, as it leads to accumulation of cells in the middle of  
428 the embryo rather than antero-proximally (Fig. 7B' vs. 7A'). Directionality, not motility, may thus be the  
429 culprit for disorganized *Mesp1* mutant mesoderm.

430

431 **Discussion**

432

433 In this study, we first aimed to overcome the big data intimidation of LSFM, allowing us to focus on  
434 several deep biological questions concerning early cardiac fate and morphogenesis. Our improved  
435 comprehensive workflow is an important step to simplify and democratize the complexities of live  
436 LSFM. Its software components are open source, portable, and easier to use than ever before, and the  
437 requisite hardware is accessible to non-microscopists (such as ourselves). Armed with fluorescent  
438 reporter mice, a widely available LSFM instrument, and this computational toolbox, we embarked on a  
439 study spanning a short yet dramatically important window in mouse development, from gestational  
440 days 6.5 to 8.0 (Fig. S7D). We identified distinct patterns of mesoderm filling, multipotent cardiac  
441 identity, and morphogenesis that critically underlie the emergence of the LHT.

442

443 During gastrulation, we observed opposing gradients of progenitor density and motility, similar to the  
444 manner in which a traffic jam propagates along the highway further and further from its origin. In  
445 presomitic mesoderm of chicks, a random motility gradient controls axis extension [46,47], and our  
446 observations of mouse lateral plate mesoderm are qualitatively and quantitatively similar. Somites,  
447 however, are periodic structures, whereas the heart is a singular object formed from the collective  
448 migration of precursors to a final destination. Therefore, the motility of lateral mesoderm is unlikely to  
449 be completely random, even if it appears quite chaotic. Our examination of *Mesp1* mutants clearly  
450 portrays initial mesoderm migration as directed, as *Mesp1* KO embryos do not form a density gradient,  
451 and cells lose directionality, thus preventing the completion mesoderm assembly.

452

453 Gastrulating zebrafish embryos are resilient to cell mixing, utilizing morphogenetic gradients to  
454 ultimately establish mesoderm patterning [48]. Our analysis demonstrates re-arrangement and  
455 crossing of cell tracks during gastrulation in the mouse, suggesting that considerable early plasticity  
456 must exist among progenitors with respect to final cell fate. Thus, it seems unlikely that rigid fate

457 allocations are present in the primitive streak region before gastrulation, but instead that general trends  
458 (i.e.  $MSX1^+$  vs.  $FOXC2^+$  nascent mesoderm) are followed with flexibility in each embryo. This  
459 reinforces the necessity of patterning cues or landmarks, largely established through morphogen  
460 gradients, that are present in the early embryo during and after arrival of mesoderm [49,50]. The  
461 distinct spatial patterns of mesoderm assembly and heart field specification, which are oblique to one  
462 another (Fig. S7C), likely explain the observed pre-configuration of cardiac fates at the time of  
463 gastrulation.

464

465 As gastrulation terminates, we demonstrate that myocardial progenitors undergo a previously  
466 unappreciated mesenchymal-epithelial transition (MET) that rapidly extends throughout the entire  
467 cardiac crescent. Moreover, we identify a temporal reduction of EMT gene expression that may have a  
468 role in this process. Further interrogating these regulators, such as through co-expression network  
469 analysis (Fig. S4H), may spark future endeavors to understand mesodermal and cardiac MET. From a  
470 structure/function perspective, efficient cell filling of the originally-empty mesoderm layer benefits from  
471 free-form movement of progenitors, guided by each other and surrounding cues [45,51]. However,  
472 formation of the heart requires each cell's movement to act upon all others in the crescent, so that net  
473 morphogenesis becomes an emergent property of the collective – and here, an epithelium is well-  
474 suited.

475

476 Once the cardiac epithelium is forged, regional discrepancies in morphogenetic behaviors emerge,  
477 such as the brisk dance-like movements of the JCF. Our data do not provide a teleological reason for  
478 the motility of the JCF. However, it may be that JCF cells are not constrained until the torsional  
479 movement of the FHF ridge and push from the SHF drives them into their pro-epicardial alcove. In  
480 terms of the SHF, whose anterior 'pushing' behavior is necessary for opening of the early heart tube, a  
481 dramatic wave of differentiation and morphogenesis actually propagates posteriorly. This pull and push  
482 mechanism is unanticipated, and provides a new insight into the formation of the LHT. Moreover,

483 dramatic medial extension of the SHF forms the heart's dorsal closure and concurrently separates  
484 inflow and outflow myocardium.

485

486 Combining these data, we establish a holistic model of early cardiogenesis to unify these findings and  
487 reconcile prior evidence (Fig. S7C). Here, the prospective LV (and pro-epicardium) lies at the farthest  
488 anterior-lateral extent of the crescent, which is the earliest born during gastrulation. Immediately medial  
489 to the LV lies the prospective RV. Within the RV progenitors, the *Tdgf1*<sup>+</sup> knob forms as RV and  
490 ultimately OFT progenitors are incorporated into the heart. Lateral to the dorsal closure lie the atrial  
491 progenitors, which are pulled anteriorly within the epithelial sheet, adding to the venous pole. Still,  
492 many unanswered questions remain, such as the necessity and sufficiency of these morphodynamics  
493 to heart formation, and the complex molecular events that trigger such dramatic activity.

494

495 Overall, our results shed light on an obscure window in early mammalian development, by connecting  
496 discrete morphological events in sequence with fine spatial and temporal resolution. This illuminates  
497 individual and collective movements of mammalian organ precursors, their origin and dynamic spatial  
498 relationships, and the complex and carefully choreographed morphogenetic steps in the formation of  
499 an embryonic organ. These findings make an important contribution to cardiac-specific, but likely  
500 generalizable features of cell allocation, which may ultimately be identified as broad themes in  
501 embryogenesis.

## 502 **Acknowledgements**

503 We thank Blaise Ndjamen for help with microscopy, and Kathryn Claiborn for editorial guidance. This  
504 work was funded by a grant from the NHLBI (R01 HL114948) and The Younger Family Fund. M.H.D.  
505 was supported by NIH T32 training grants 2T32-HL007731-26 and T32-HL007843-24, as well as  
506 funding from UCSF Department of Medicine, Division of Cardiology. A.L.K. was supported by  
507 scholarships from the NSF (GRFP 2034836) and the AHA/CHF (817268). J.M.M. was supported by an  
508 NIH T32 training grant 5T32-HL007544-34, and NIH F32 fellowship 1F32-HL162450-01. This work  
509 was also supported by an NIH/NCRR grant (C06 RR018928) to the J. David Gladstone Institutes.

510

## 511 **Author Contributions**

512 M.H.D. and B.G.B. designed the project. M.H.D. imaged all live embryos, performed immunostaining  
513 and imaging, developed computational tools, and analyzed the data. A.L.K. generated scRNAseq data.  
514 J.M.M. benchmarked quantitative analyses. M.H.D. wrote the paper with input from the other authors.

515

## 516 **Competing Interests**

517 B.G.B. is a founder, shareholder, and advisor of Tenaya Therapeutics, and is an advisor for  
518 SilverCreek Pharmaceuticals. The work presented here is not related to the interests of these  
519 commercial entities.

520

521

522 **Figure 1**

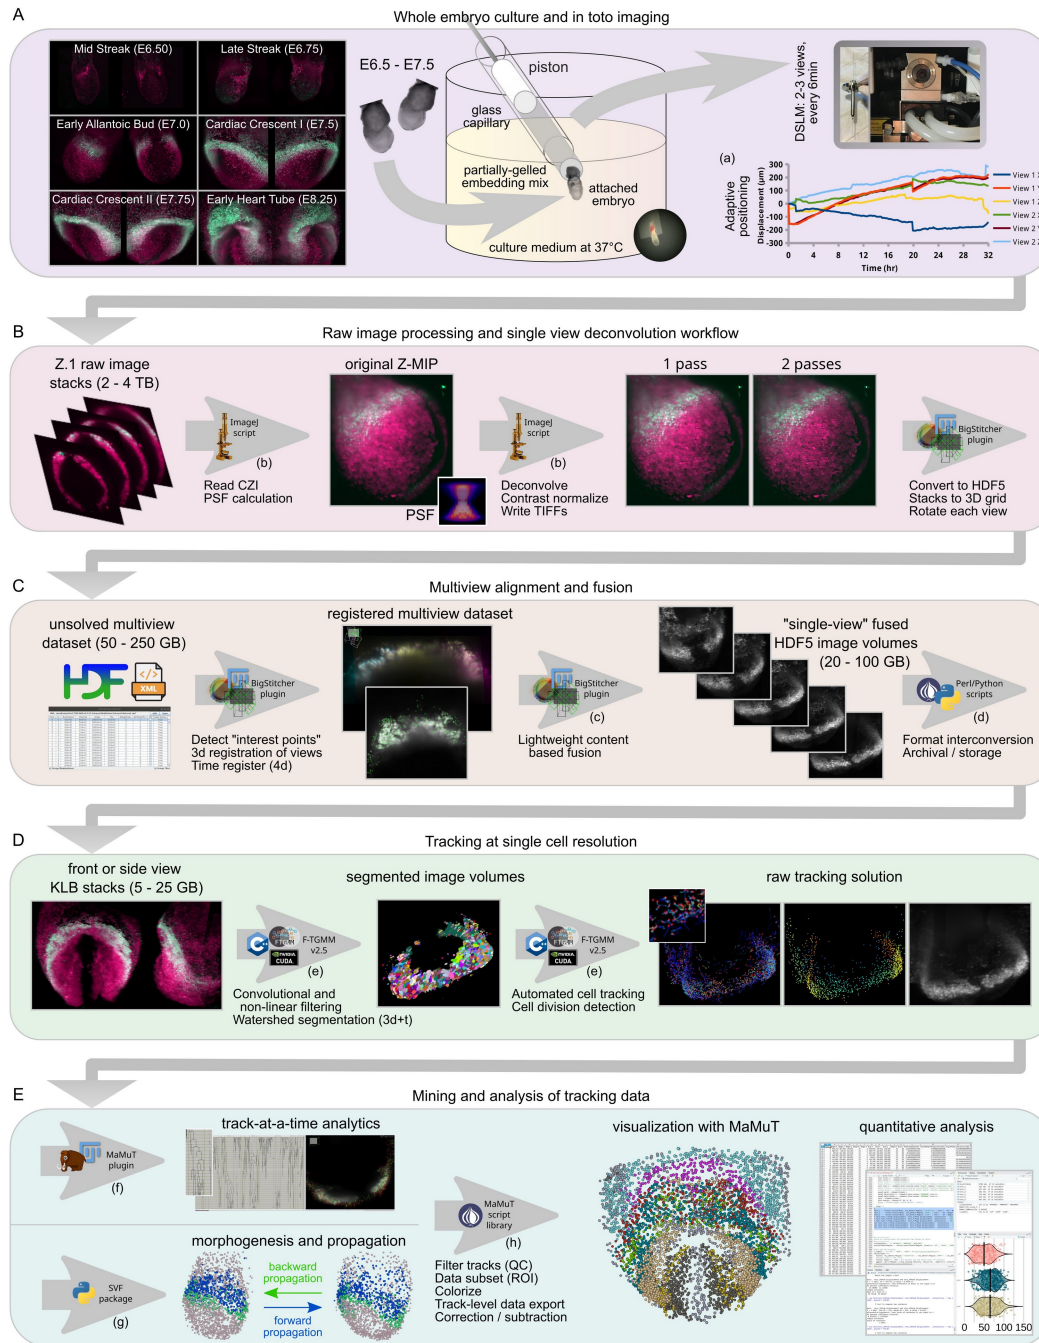

524 **Figure 1: Comprehensive workflow for quantitative analysis of embryogenesis by live LSM**

525 **A. Biology and microscopy protocol. Red signal: *Mesp1* lineage, green signal: *Smarcd3*-F6-nGFP.**

526 ZLAPS adaptive positioning example is shown, demonstrating shifts of two views' XYZ positions

527 needed to maintain the embryo in the center of the view. **B. Initial raw .czi computational workflow,**

528 depicting macro-based batch deconvolution, filtering, and image import to BigStitcher. **C.** Multiview  
529 alignment to generate single image volume for each channel and timepoint. **D.** Improved tracking with  
530 F-TGMM v2.5. **E.** F-TGMM results can be refined using SVF, generating long-track morphodynamic  
531 models, or can be examined raw. MaMuT Perl script library annotates, filters, subsets, combines, and  
532 exports data. Lower case letters correspond with repositories listed in Software table within materials  
533 and methods.  
534



535 **Figure 2**

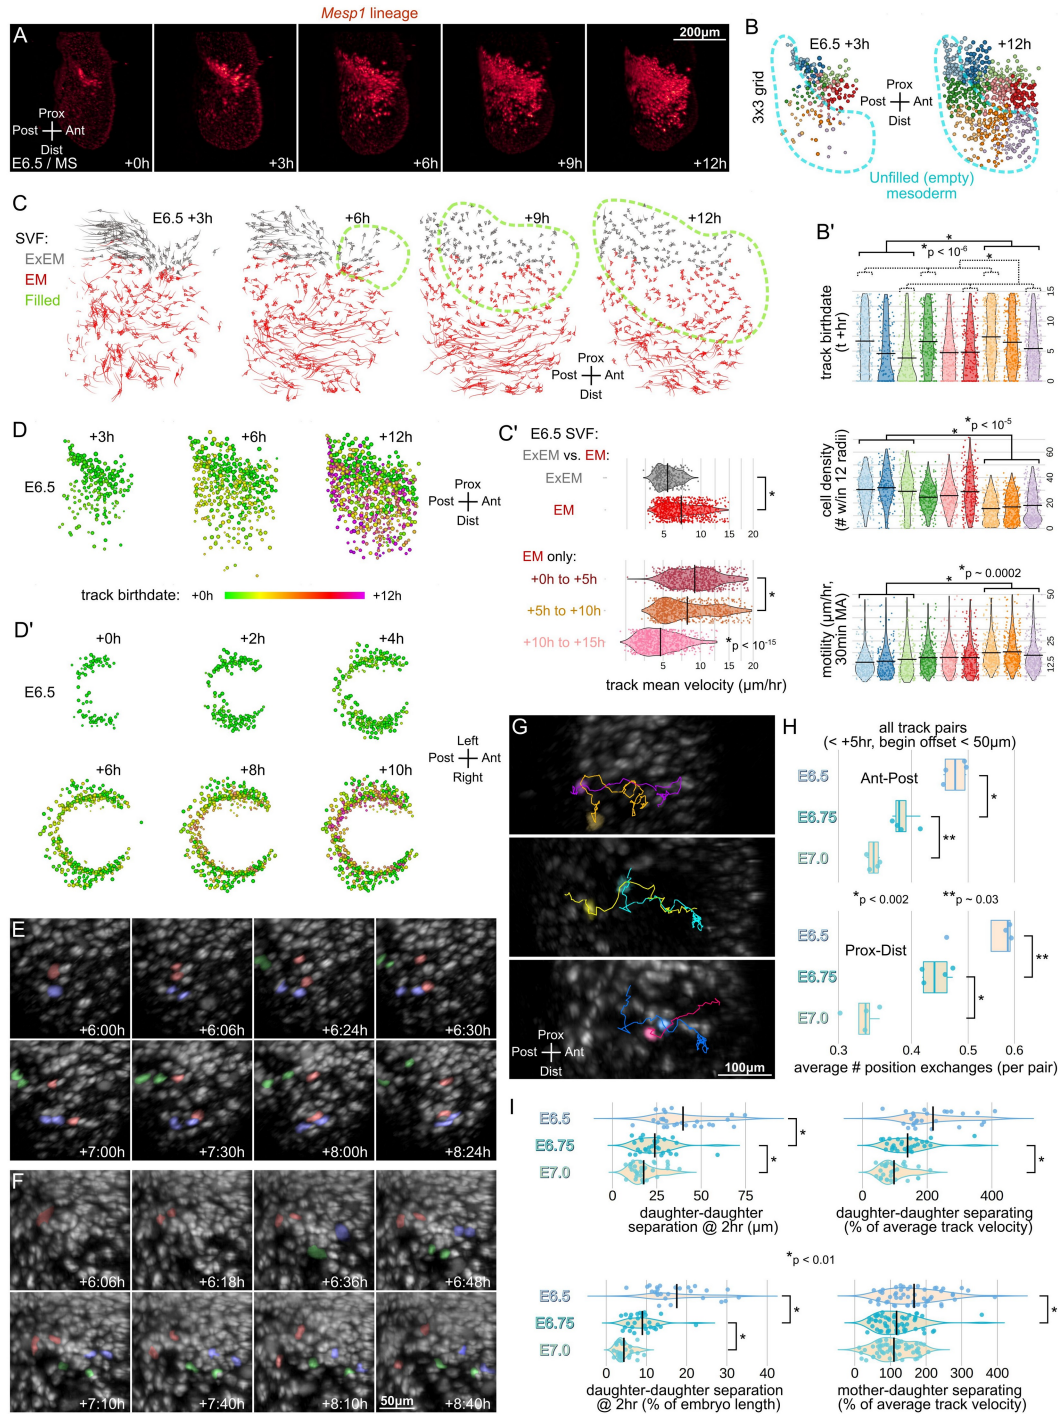

537 Figure 2: A spatiotemporal gradient of mesoderm accumulation

538 **A.** Time-lapse whole-embryo LSFM imaging of *Mesp1* lineage at E6.5, showing lateral view right-half

539 max projections. **B.** Side views of a TGMM/MaMuT reconstructed E6.5 embryo during live imaging,

540 with all tracks retrospectively partitioned onto a 3x3 grid. **B'**. TGMM tracks analyzed from +0h to +15h  
541 for birthdate, motility, and cell density. **C**. TGMM/SVF reconstruction of E6.5 anterior mesoderm  
542 migration, in orthographic projection with uniform sparsification. Extraembryonic (ExEM) and  
543 embryonic (EM) compartments are colored. **C'**. Quantification of this SVF series. **D-D'**. TGMM  
544 reconstruction E6.5 embryo live imaging, cells painted by track birthdate. **E-F**. Three manually  
545 annotated, randomly dispersed, division events are shown in each **E** and **F**, overlaid in false color  
546 (division nodes and daughter cells) on single sided, lateral Z-projections from live imaging experiments  
547 at E6.5. **G-H**. Analysis of TGMM track crossing behavior, using pairwise analysis of tracks from E6.5 to  
548 E7.0. Three unrelated pairs of nearby tracks during an E6.5 acquisition are shown in **G**. **H**. Track pair  
549 crossing events (each point is the mean of a half-embryo subset) are assessed in the anterior-  
550 posterior (top panel) and proximal-distal (bottom panel) axes, as a function of embryo stage. **I**.  
551 Quantification of division cohorts from E6.5 to E7.0 demonstrates separation behaviors of daughters  
552 following division (see **E-F** above).  
553

554 **Figure 3**

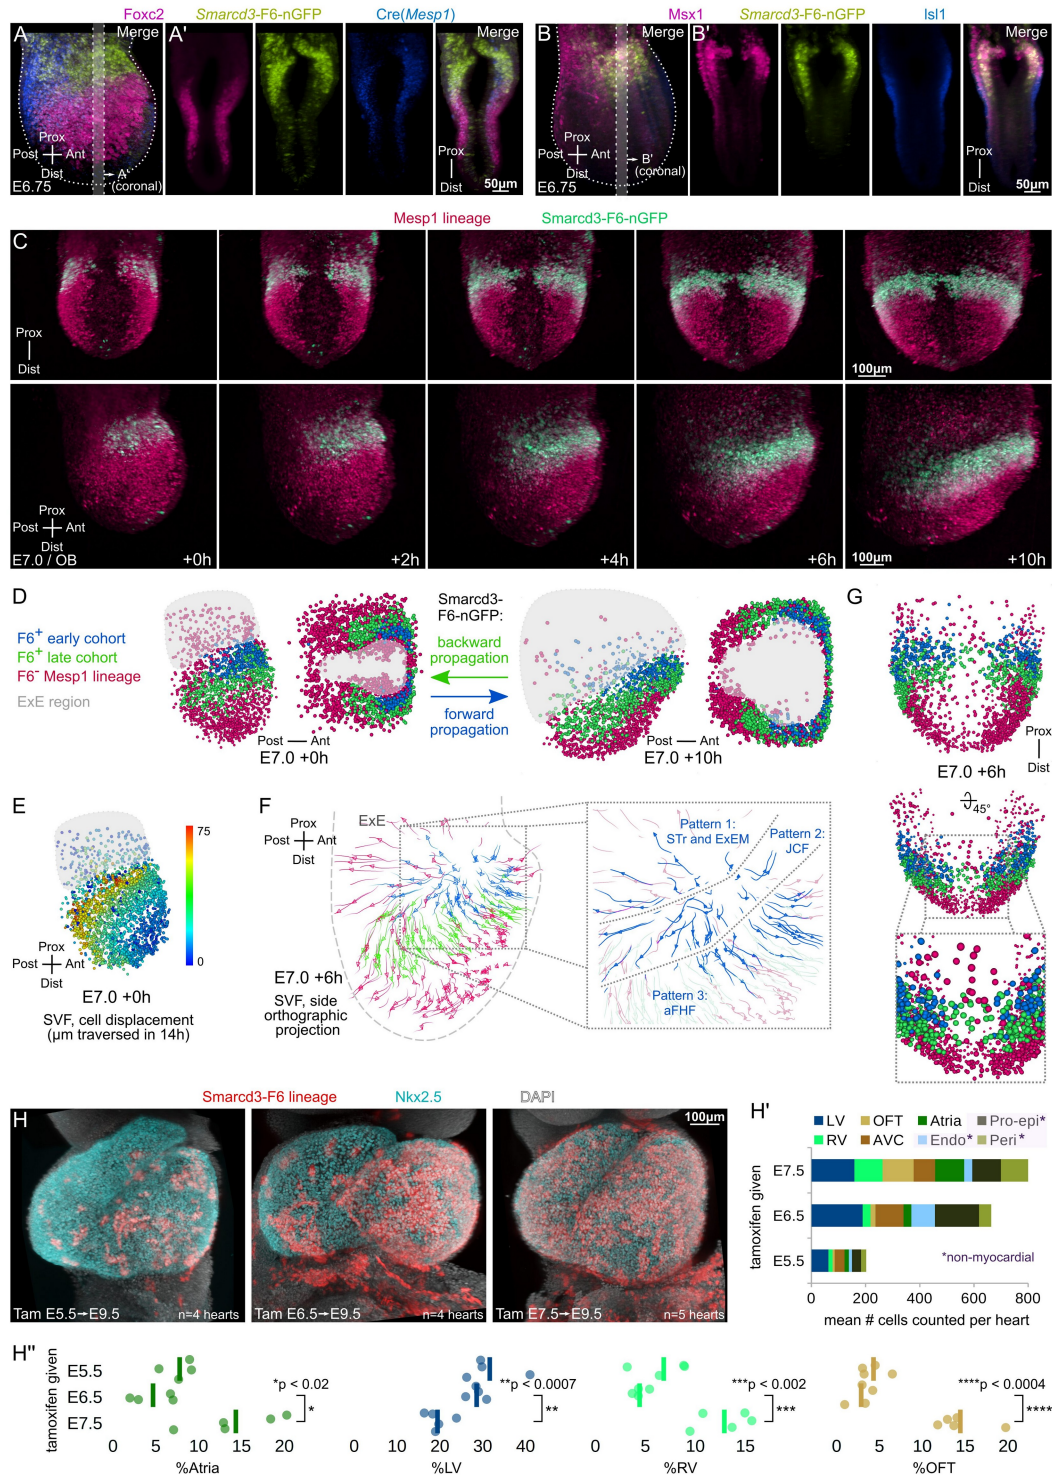

556 **Figure 3: Birth of the Smarcd3-F6 cardiac progenitors**

557 **A-B.** LSFM imaging of fixed E6.75 embryos shows that Mesp1-lineage-derived embryonic mesoderm  
558 is divided into two compartments, a distal FOXC2<sup>+</sup>;F6<sup>-</sup> compartment (**A**), and a proximal MSX1<sup>+</sup>;F6<sup>+</sup>  
559 compartment (**B**). **A',B'**: Coronal slices from **A,B**. **C.** Time-lapse whole-embryo imaging at E7.0,  
560 demonstrating the onset and expansion of *Smarcd3*-F6-nGFP<sup>+</sup> progenitors. Fused image sequence in  
561 frontal view (top row) and side view (bottom row). **D.** TGMM and SVF reconstruction of the total  
562 Mesp1-lineage population of cells, painted by F6 status: F6<sup>-</sup>, or either F6<sup>+</sup> at the start (early cohort), or  
563 F6<sup>+</sup> after twelve hours (late cohort). MaMuT display of the TGMM/SVF solution at the times indicated,  
564 from the side view (first and third panels in **D**), and Mercator projection (second and fourth panels in  
565 **D**). **E.** The same TGMM/SVF time-lapse sequence shown in **D** is depicted in MaMuT from the side  
566 view, with cells colored by the total displacement of their tracks. **F.** The TGMM/SVF solution is  
567 displayed in MaMuT (at the timepoint indicated) using an orthographic projection from the side, to  
568 depict the three classes of early F6<sup>+</sup> cohort cells (inset). **G.** The midline breach forming the arch of the  
569 crescent is made up of both early- and late cohort F6<sup>+</sup> progenitors. **H-H''.** Lineage tracing using  
570 *Smarcd3*-F6-CreERT2;Ai14 mice. NKX2.5 and DAPI counter-labeling as shown.  
571



583 **F'**. Differentially-expressed epithelial-to-mesenchymal transition genes. **G**. Violin plots of select EMT-  
584 governing transcription factors by timepoint. **H**. Overlap of select genes in UMAP space.

585



588 Figure 5: Movement of cell populations during crescent MET

589 **A-A'**. SVF reconstructions of cardiac crescent MET at indicated timepoints (**A**). Cell tracks,  
590 coordinates, and tissue assignments (color legend shown in **A**) are derived from backwards-  
591 propagated SVF data. **A'**. Positions of pericardial, myocardial, and endocardial cells in the dorsal-  
592 ventral axis determined through backwards propagation, for cells near the anterior crescent apex or in  
593 the middle of the crescent. **B-B'**. Time-lapse whole-embryo LSM at E7.5-E7.75 using the *Mef2c*AHF  
594 lineage reporter, with ventral max projection (**B**) and lateral (**B'**) views. **C-C'**. SVF reconstruction at  
595 indicated timepoints from dorsal and ventral views, showing only FHF, SHF, and JCF. Peak SVF track  
596 displacement is quantified (**C'**, with endoderm correction in right panel). **D**. JCF cells are false colored  
597 in pink to highlight their position and orientation. **D'**. Quantification of long-axis orientations of nuclei  
598 comparing JCF to cardiac crescent ("CC") cells (**D'**, top panel corresponds to anterior midline 'a.m.' in  
599 **D**, middle panel corresponds to posterolateral crescent 'p-l.' in **D**), with p-values from Watson U<sup>2</sup> test.  
600 **D''**. Motility of JCF and CC cells. **E**. Time-lapse sequence from ventral partial max projection images  
601 using false colors to highlight a sample of six cells (3 JCF, 3 CC) throughout the sequence. **F**. UMAP  
602 space analysis of single cell RNA sequencing of mesoderm E7.75 and E8.25 [39]. **G**. Comparison of  
603 gene expression in FHF and JCF clusters; top log<sub>2</sub>FC differentially expressed genes plotted. **H**. Ten  
604 most significant GO BP categories for significantly altered genes. **H'**. Five interesting BP terms  
605 inspected by gene membership and log<sub>2</sub>FC differential expression (JCF versus FHF).

606



607 **Figure 6**

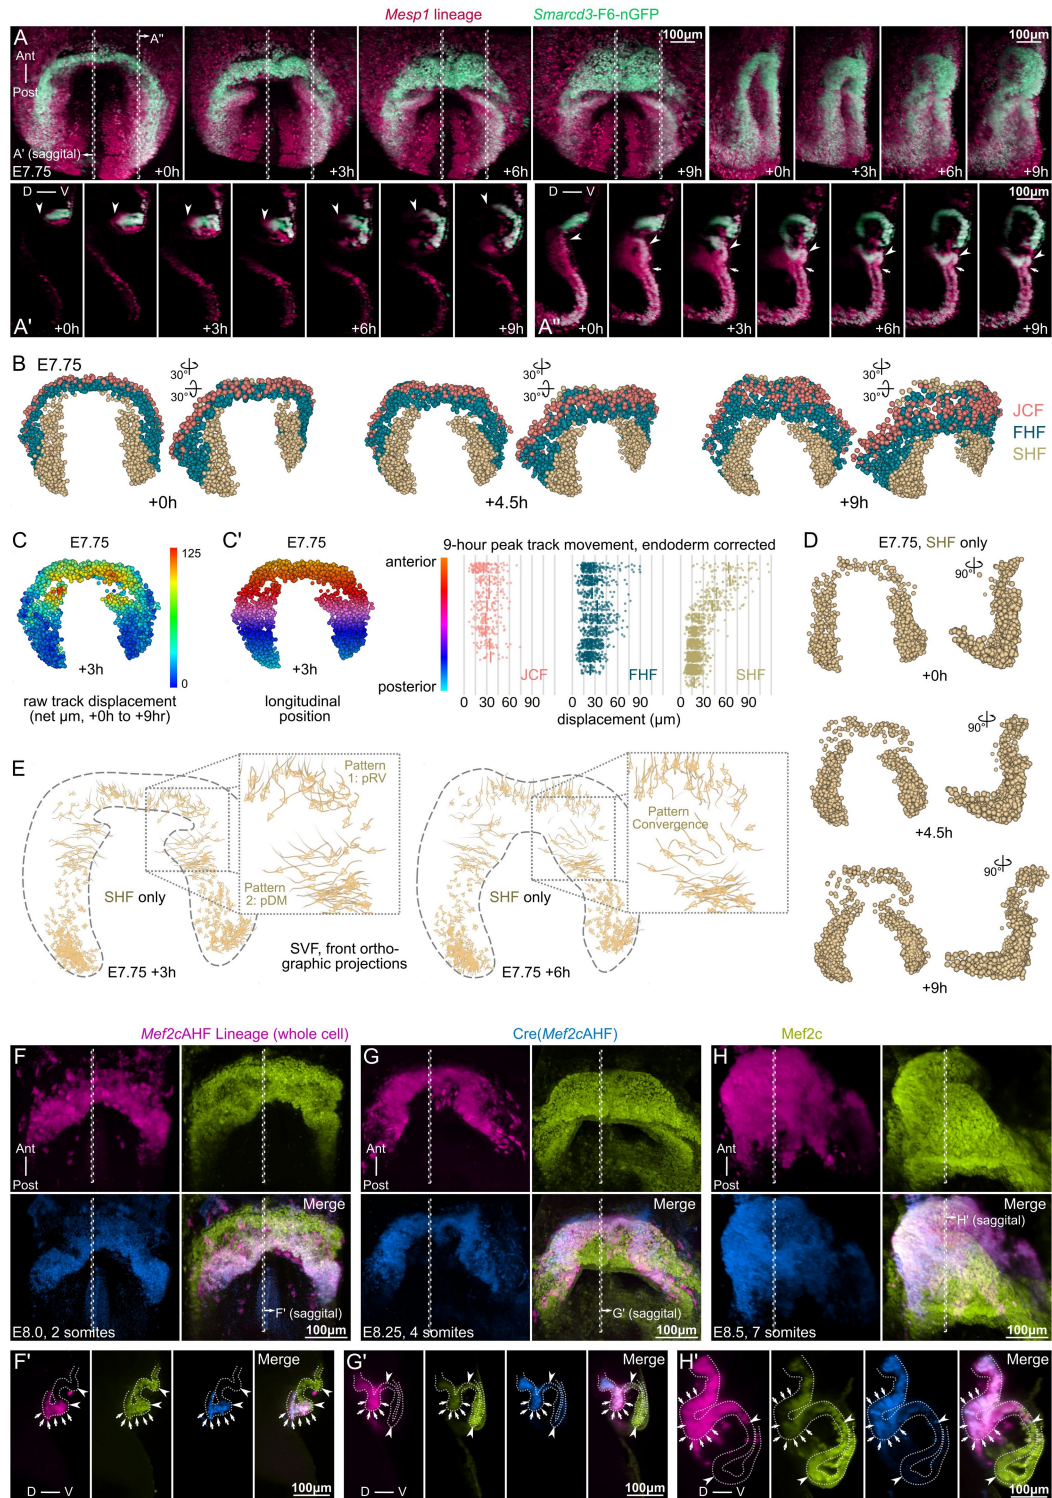

609 **Figure 6: Transformation of the epithelial cardiac crescent into the early heart tube**

610 **A-A''**. Time-lapse whole-embryo LSFM imaging starting at E7.75, with max projection ventral (left four  
611 panels in **A**) and lateral oblique (right four panels in **A**) views. 7.5 $\mu$ m thick sagittal slices from indicated  
612 regions in **A** are also shown (**A'**, **A''**). Arrowheads and arrows in **A'** and **A''** point to congruent cells at  
613 different timepoints. **B**. SVF reconstructions of tracked images series are shown at indicated  
614 timepoints from ventral and angulated views, with only FHF, SHF, and JCF cells drawn. **C-C'**.  
615 Quantitative analysis of SVF reconstruction shown in **B**, with cells colored by their track's displacement  
616 (**C**) or by their anterior-posterior position (left panel in **C'**). **D**. SVF reconstructions were re-drawn from  
617 ventral and lateral views, with only SHF cells at indicated timepoints. **E**. Examination of morphogenic  
618 dynamics within the SVF revealing two distinct regional patterns. **F-H'**. LSFM examination of fixed  
619 embryos for lineage tracing of *Mef2c*AHF, during LHT formation. Max projection ventral views labeled  
620 for MEF2C protein, *Mef2c*AHF-Cre, and *Mef2c*AHF lineage are shown at 2 somites (**F**), 4 somites (**G**),  
621 and 7 somites (**H**). Midline sagittal planes (7.5 $\mu$ m thick slices) at indicated stages (**F'**, **G'**, **H'**) are  
622 examined for movement of SHF cells into the heart, a process that leads to dorsal mesocardium  
623 formation and closure of the LHT.  
624

625 **Figure 7**

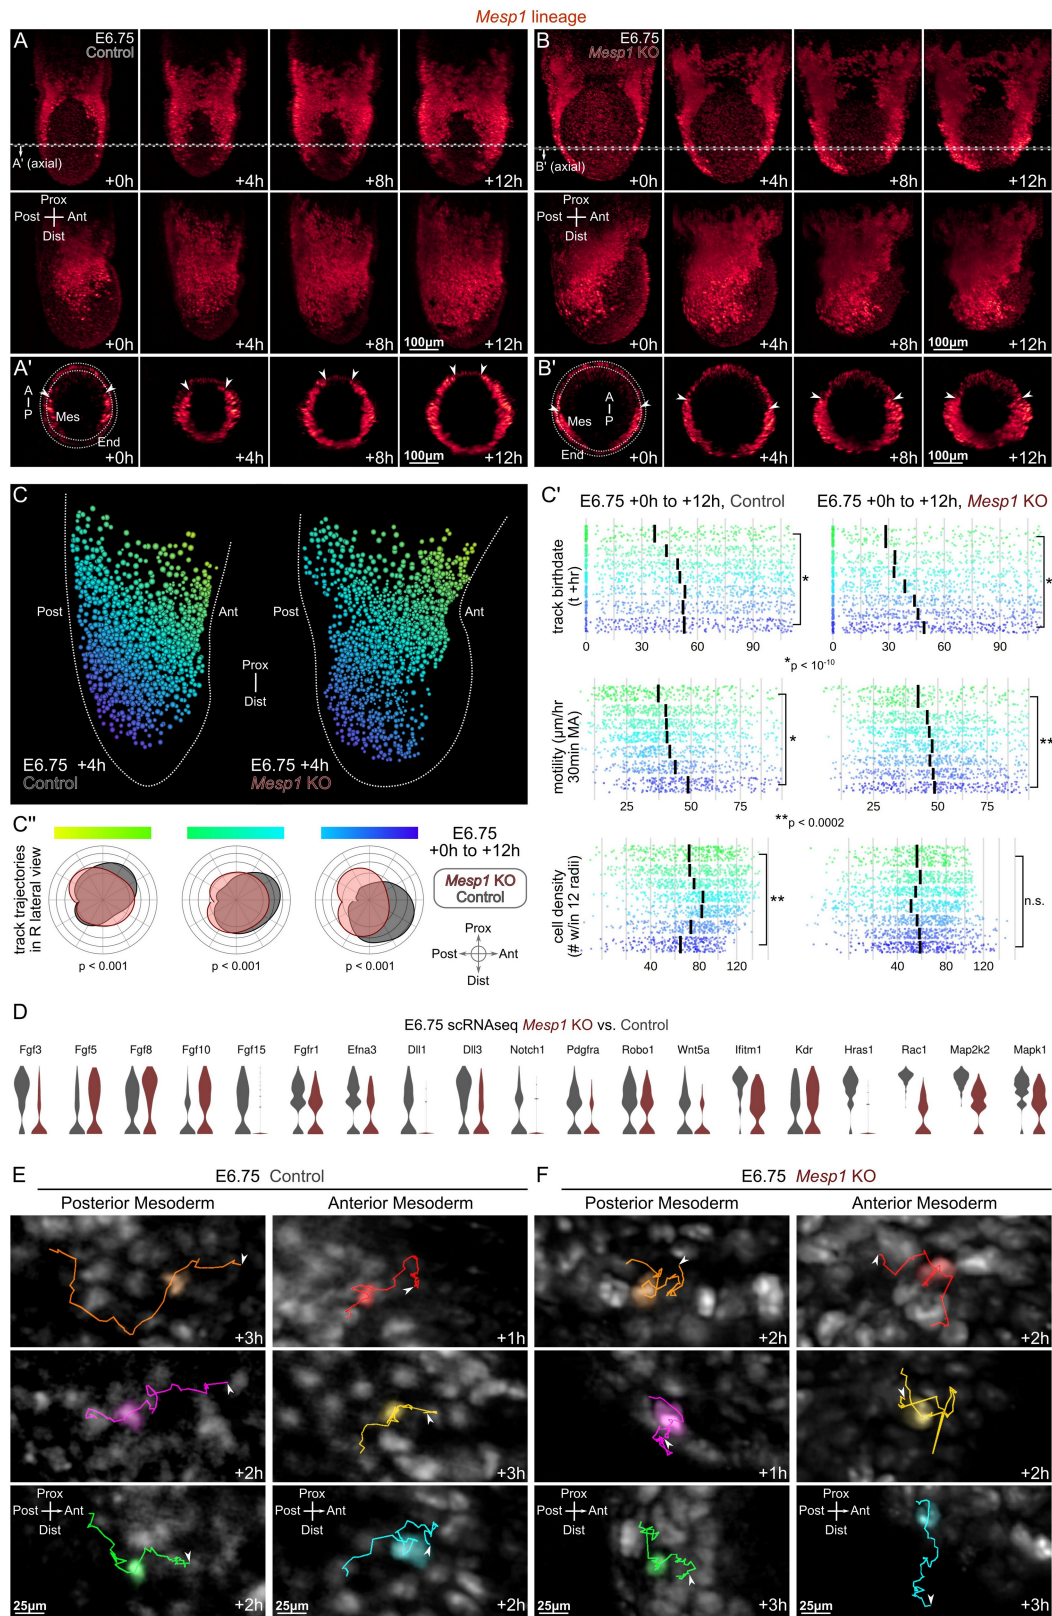

627 Figure 7: Loss of *Mesp1* disrupts the density gradient that forms following gastrulation, altering  
628 mesoderm organization

629 **A-B'**. Time-lapse whole-embryo LSFM imaging at E6.75. Control embryos: **A-A'**; *Mesp1* mutant  
630 embryos: **B-B'**. Max projection views are shown from ventral view (top row in **A** and **B**) and lateral view  
631 (second row in **A** and **B**). 7.5µm-thick axial cutaways from indicated regions in **A** and **B** are also shown  
632 (**A'**, **B'**). Mes = mesoderm, End = endoderm, A/Ant = anterior, P/Post = posterior, Prox = proximal, Dist  
633 = distal. **C-C'**. Quantitative analysis of raw TGMM tracks in control (left panels in **C-C'**) and *Mesp1*  
634 mutant (right panels in **C-C'**) time lapse data. **C''**. Density distribution of mesoderm track trajectories.

635 **D**. Single cell RNA sequencing of gastrulating mesoderm progenitors, with various migration-related  
636 features depicted by expression. **E-F**. Qualitative analysis of tracks (of duration 4-6h shown) in control  
637 (**E**) and *Mesp1* mutant (**F**) time lapse series. Left panel column in each of **E** and **F** show TGMM tracks  
638 originating in posterior regions, where right panels in each show anterior originating tracks.

639 Arrowheads in **E** and **F** demarcate track endpoints.

640

641 **Figure S1**

642

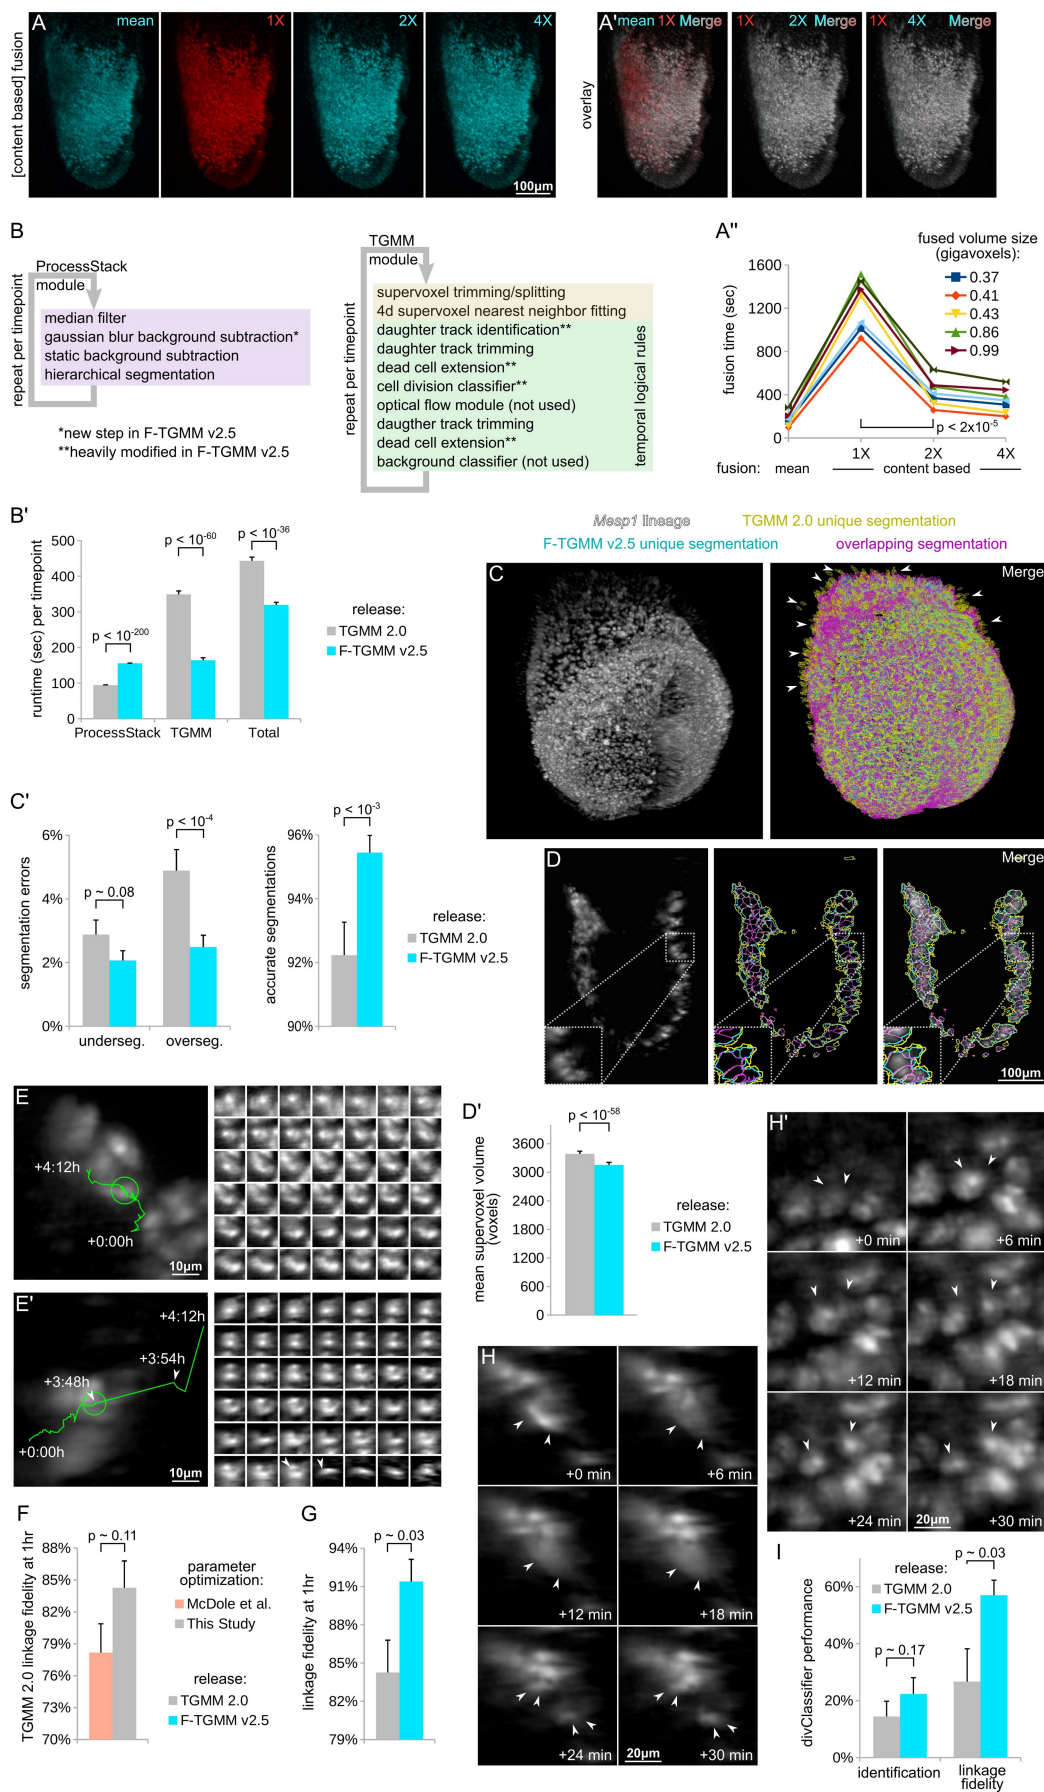

643 Figure S1: Improvements to LSFM computational workflow, comparative analysis, related to Figure 1  
644 **A-A'**. Speed-optimized (2X or 4X downsampled weight) content-based fusion produces nearly  
645 identical results as the original content-based fusion algorithm (1X), but with much lower computational  
646 overhead. Comparisons of embryo max lateral projections (**A**) show qualitative benefit to content-  
647 based rather than mean fusion (left panel in **A'**). 2X and 4X speed optimized methods yield similar  
648 benefit (second and third panels in **A'**). Comparisons of CPU time for the various methods across  
649 several datasets is shown in **A''**. **B-B'**. Refinements to the main loops of TGMM components, yielding  
650 improved overall tracking efficiency for F-TGMM v2.5 compared with TGMM 2.0. Benchmarks of  
651 component runtimes is shown in **B'**. **C-D'**. Segmentation accuracy of F-TGMM v2.5, showing  
652 oversegmentations (arrowheads in **C**) and undersegmentations (inset in **D**) that are corrected by  
653 dynamic background subtraction. Segmentation errors and total accurate segmentations are quantified  
654 in **C'**. Also due to dynamic background subtraction, mean supervoxel size is lower in F-TGMM v2.5  
655 (**D'**), which contributes to the overall improved efficiency of F-TGMM v2.5 versus TGMM 2.0. **E-G**.  
656 Assessment of tracking. Two 4-hour cell tracks are shown, one with correct linkage across the entire  
657 timespan (**E**), the other with a two large shifts (**E'**, at +3:48h and +4:06h) that reflect incorrect linkage  
658 to a distant, unrelated cell. In **F**, tracking accuracy in 1-hour segments was quantified for TGMM 2.0,  
659 using empirically optimized parameters versus those previously published as optimal [29]. In **G**,  
660 tracking accuracy in 1-hour segments was quantified for TGMM 2.0 vs. F-TGMM v2.5. **H-I**, Division  
661 accuracy quantification of TGMM 2.0 versus F-TGMM v2.5. In **H**, a correctly tracked division event with  
662 mother and daughter cells (arrowheads in **H**) shown in time lapse. In **H'**, an incorrect cell division  
663 occurred when two neighboring cells (arrowheads in **H'**) separated. **I**. Quantification of cell division  
664 tracking in TGMM 2.0 versus F-TGMM v2.5, by primary identification of cell divisions and by linkage  
665 accuracy once a division is identified.  
666

667 **Figure S2**

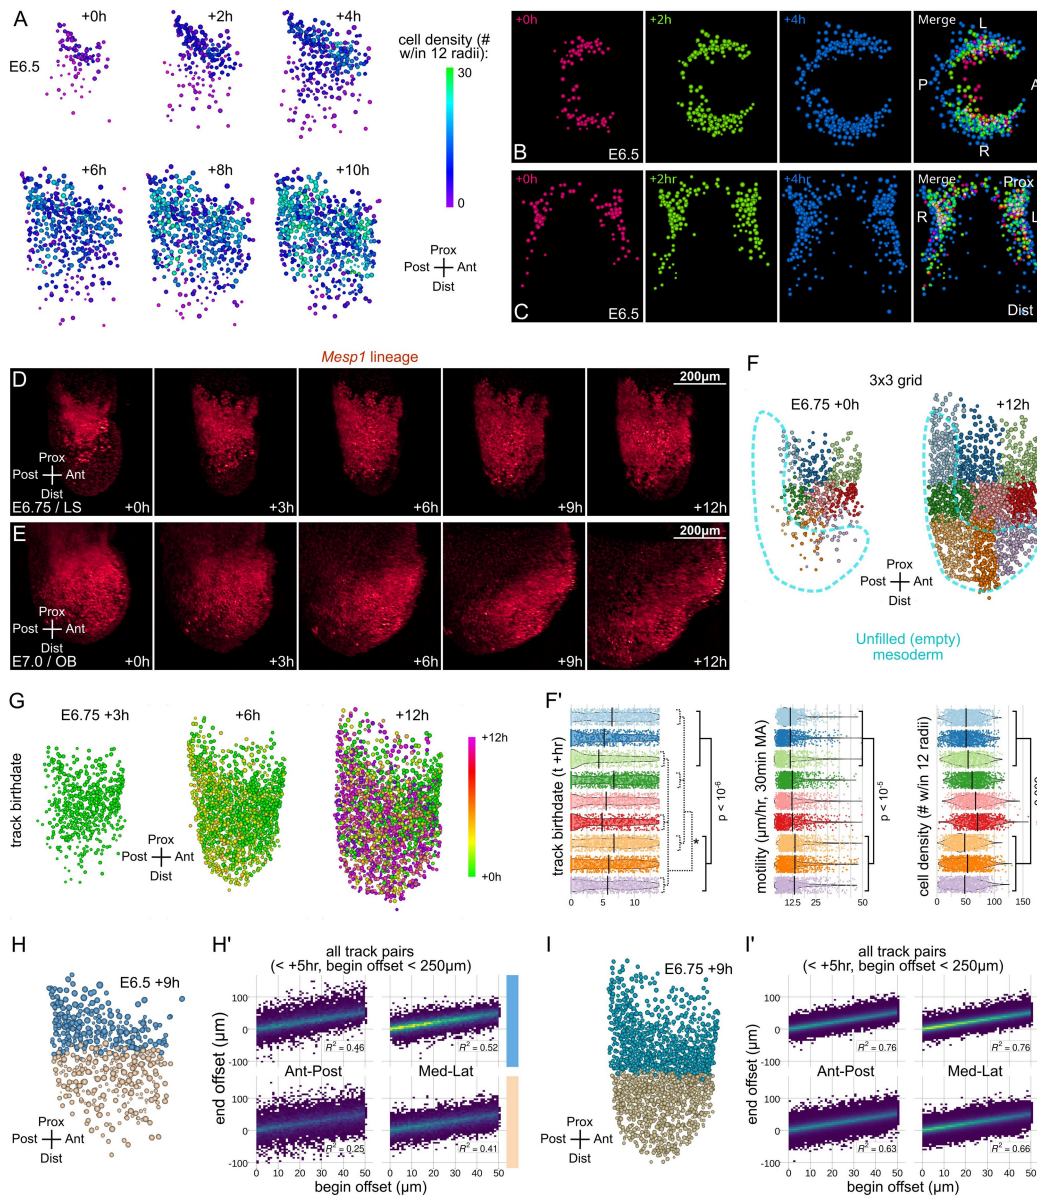

669 Figure S2: A spatiotemporal gradient of mesoderm accumulation, related to Figure 2

670 **A.** TGMM reconstruction of E6.5 embryo live imaging, cells painted by cell density. **B-C.**

671 TGMM/MaMuT reconstructions of E6.5 mesoderm filling, as seen from top (**B**) and front/ventral views

672 (**C**). Cells are uniformly colored by timepoint snapshotted (with time-lapse merge in the right-hand

673 panels). **D-E.** Time-lapse whole-embryo LSFM imaging of *Mesp1* lineage at E6.75 (**D**) and E7.0 (**E**),

674 showing right-half max Z-projections. **F.** Side views of a TGMM/MaMuT reconstructed E6.75 embryo

675 during live imaging, with all tracks retrospectively partitioned onto a 3x3 grid (anterior-proximal in light  
676 green, posterior-distal in lilac). Spatial binning shows mesoderm filling of newborn cells into  
677 progressively posterior and distal/medial regions. **F'**. TGMM tracks, in each 3x3 bin (also including the  
678 nearest half of tracks belonging to each adjacent bin) were analyzed from +0h to +15h for birthdate  
679 (track start timepoint), motility (average of moving average velocity sampled over 30-minute window),  
680 and cell density (number of other cells within 12 radii of each). **G**. Side view TGMM reconstruction of  
681 E6.75 embryo during live imaging, with cells painted by track birthdate. **H-I'**. In **H** (E6.5) and **I** (E6.75),  
682 cells are divided into two bins based on their proximal-distal position. All pairs of TGMM tracks  
683 originating during acquisitions from +0hr to +5hr are considered, if the cells are initially offset by less  
684 than 250 $\mu$ m in the specified axis (proximal-distal or anterior-lateral) of analysis. End offset is plotted as  
685 a function of begin offset (E6.5 in **H'** and E6.75 in **I'**) in a density scatterplot, with linear correlation  
686 coefficient shown. Note the greater correlation (i.e. greater correspondence in the position of each  
687 track pair) in proximal positions and E6.75 versus E6.5.  
688



689 **Figure S3**

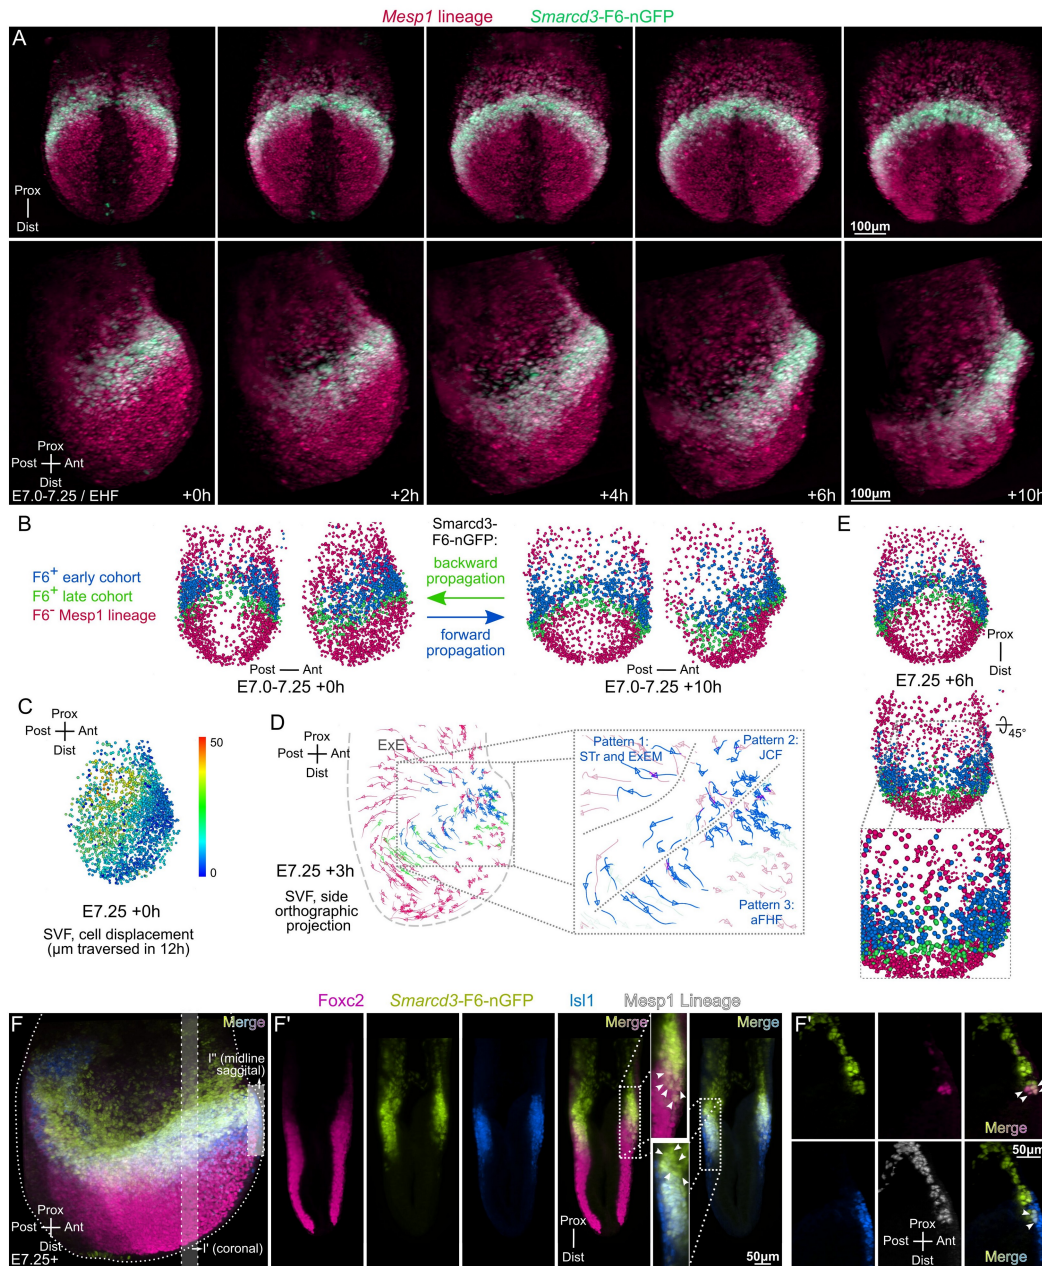

691 Figure S3: Birth of the *Smarcd3-F6* cardiac progenitors, related to Figure 3

692 **A.** Time-lapse whole-embryo imaging by light sheet microscopy at E7.0-E7.25, an alternate dataset  
 693 that demonstrates the onset of cardiac specification (*Smarcd3-F6-nGFP*). The fused image sequence  
 694 is displayed from the frontal (ventral) view (top row) and side view (bottom row). **B.** TGMM and SVF  
 695 reconstruction of the dataset shown in **A**, with the total *Mesp1*-lineage population painted by F6 status

696 (colors as indicated): F6<sup>-</sup>, or either F6<sup>+</sup> at the start (early cohort), or F6<sup>+</sup> after ten hours (late cohort).  
697 MaMuT display of the TGMM/SVF solution at the times indicated, from the front/ventral view (first and  
698 third panels in **B**), or side view (second and fourth panels in **B**). **C**. The same TGMM/SVF time-lapse  
699 sequence shown above is depicted in MaMuT from the side view, with cells colored by the total  
700 displacement (units and scales as shown) of their tracks. **D**. The TGMM/SVF solution is displayed in  
701 MaMuT (at the timepoint indicated) using an orthographic projection from the side, to depict the three  
702 classes of early F6<sup>+</sup> cohort cells (inset) by migration pattern. **E**. The arch of the crescent is made up of  
703 both early- and late cohort F6<sup>+</sup> progenitors, as seen from the front (ventral) view in MaMuT (top panel  
704 in **E**), and further confirmed in zoom/rotation (middle panel in **G** and inset). **F-F''**. By E7.25, *Smarcd3*-  
705 F6 labeling has spread distally and posteriorly (side view max projection in **I**), and coronal sections  
706 show it now encompasses FOXC2<sup>+</sup> early mesoderm progenitors (first merge panel from the left in **F'**).  
707 Also at E7.25, ISL1 is present in F6<sup>+</sup> cardiac progenitors, but is excluded from prospective JCF cells  
708 overlying the forming crescent (second merge panel from the left in **F''**). At the now-crossed ventral  
709 anterior midline (narrow partial side view projection in **F''**), F6<sup>+</sup>;ISL1<sup>-</sup> and F6<sup>+</sup>;FOXC2<sup>+</sup>;ISL1<sup>+</sup>  
710 progenitors are present, corroborating findings from TGMM/SVF and lineage tracing experiments  
711 above.  
712

713 **Figure S4**

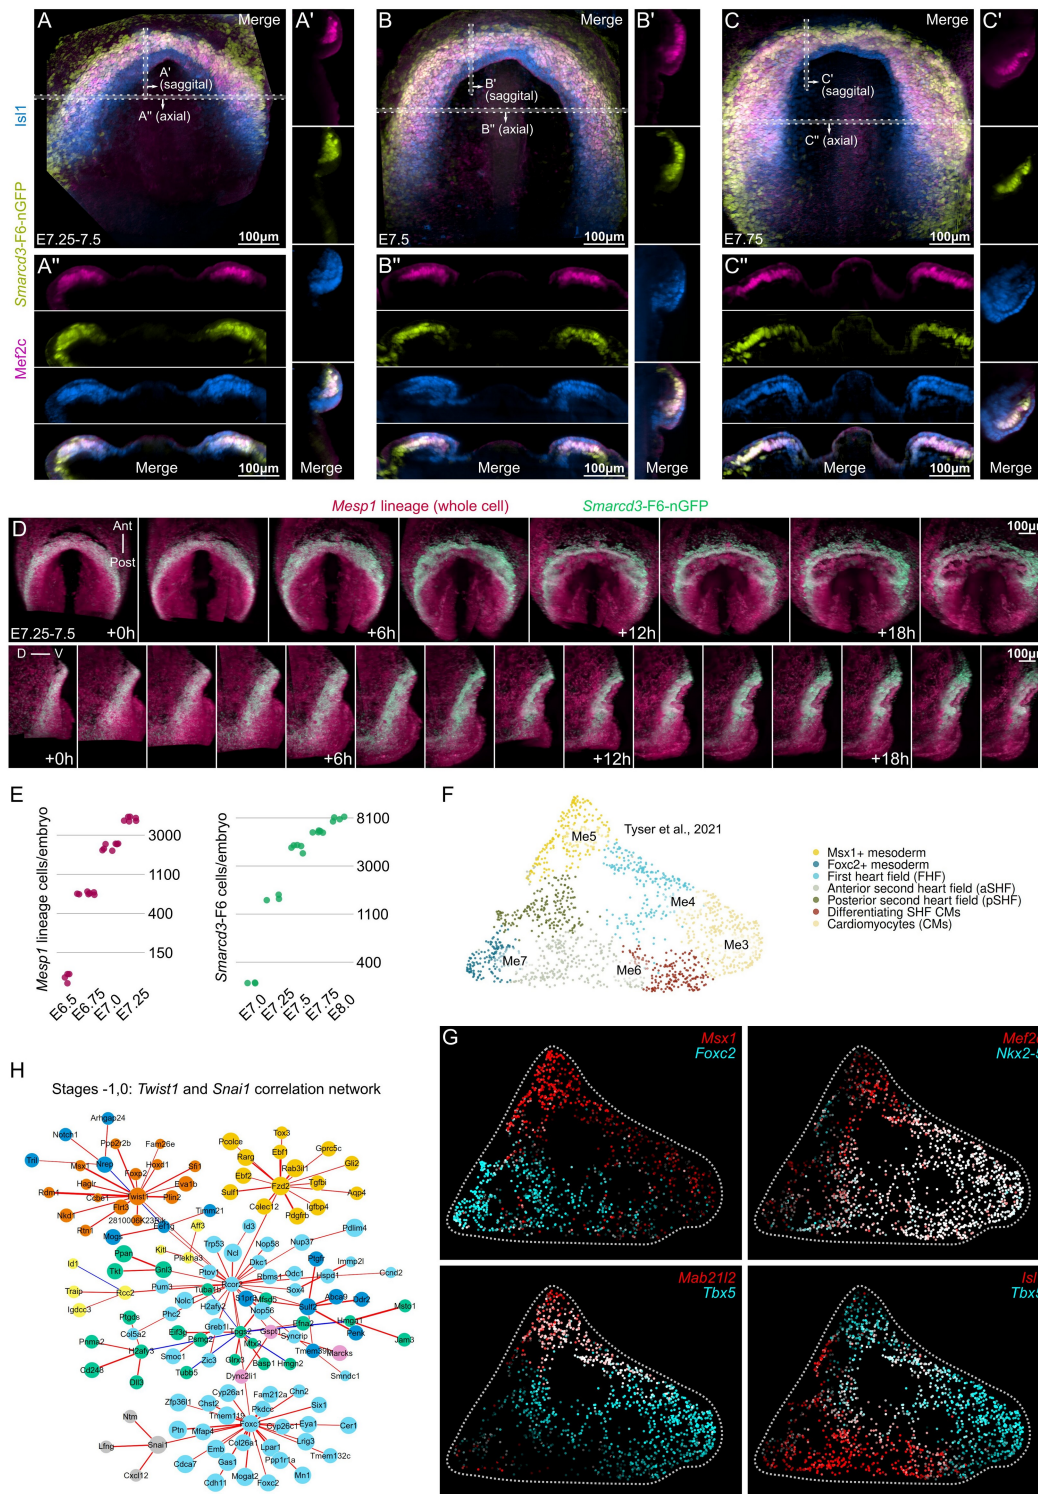

715 **Figure S4: Mesenchymal-epithelial transition of the cardiac crescent, related to Figure 4**

716 **A-C''**. LSFM imaging of fixed E7.5-E7.75 embryos shows that the cardiac crescent transforms  
717 dynamically during foregut pocket involution. Ventral maximum projections (**A,B,C**) demonstrate subtle  
718 morphological changes within the cardiac crescent. Sagittal slices in the arch of the crescent are  
719 shown (**A',B',C'**), as well as axial slices (**A'',B'',C''**), showing a similar transformation to flat sheet. **D**.  
720 Time-lapse whole-embryo imaging by light sheet microscopy at E7.25-E7.5, demonstrating splitting of  
721 the mesoderm and mesenchymal-epithelial transition of the cardiac crescent. The fused image  
722 sequence is displayed from the frontal (ventral) and lateral partial maximum projections. **E**. Estimated  
723 *Mesp1* lineage (based on TGMM cells in each frame of *Mesp1* lineage tracked datasets, accounting  
724 for an estimate of endoderm and non-bona fide mesoderm) and *Smarcd3*-F6 (based on TrackMate  
725 detection, with DoG radius 15px and threshold between 6 and 7) cell counts at stated timepoints  
726 across several embryos. **F**. UMAP shown in Fig. 4D, with superimposed labels corresponding to the  
727 clusters as named in source publication [9]. **G**. Notable markers are depicted in qualitative co-  
728 expression feature plots. **H**. Pearson correlation is performed on Twist1 and Snai1 across all features  
729 and cells of the dataset, and the correlation matrix for the top 70 candidates with strongest coefficient  
730 for each is used to construct a speculative gene regulatory network, using a  $|r| > 0.25$  cutoff. Blue lines  
731 indicate negative correlations, edge width indicative of  $|r|$ .  
732

733 **Figure S5**

734

735

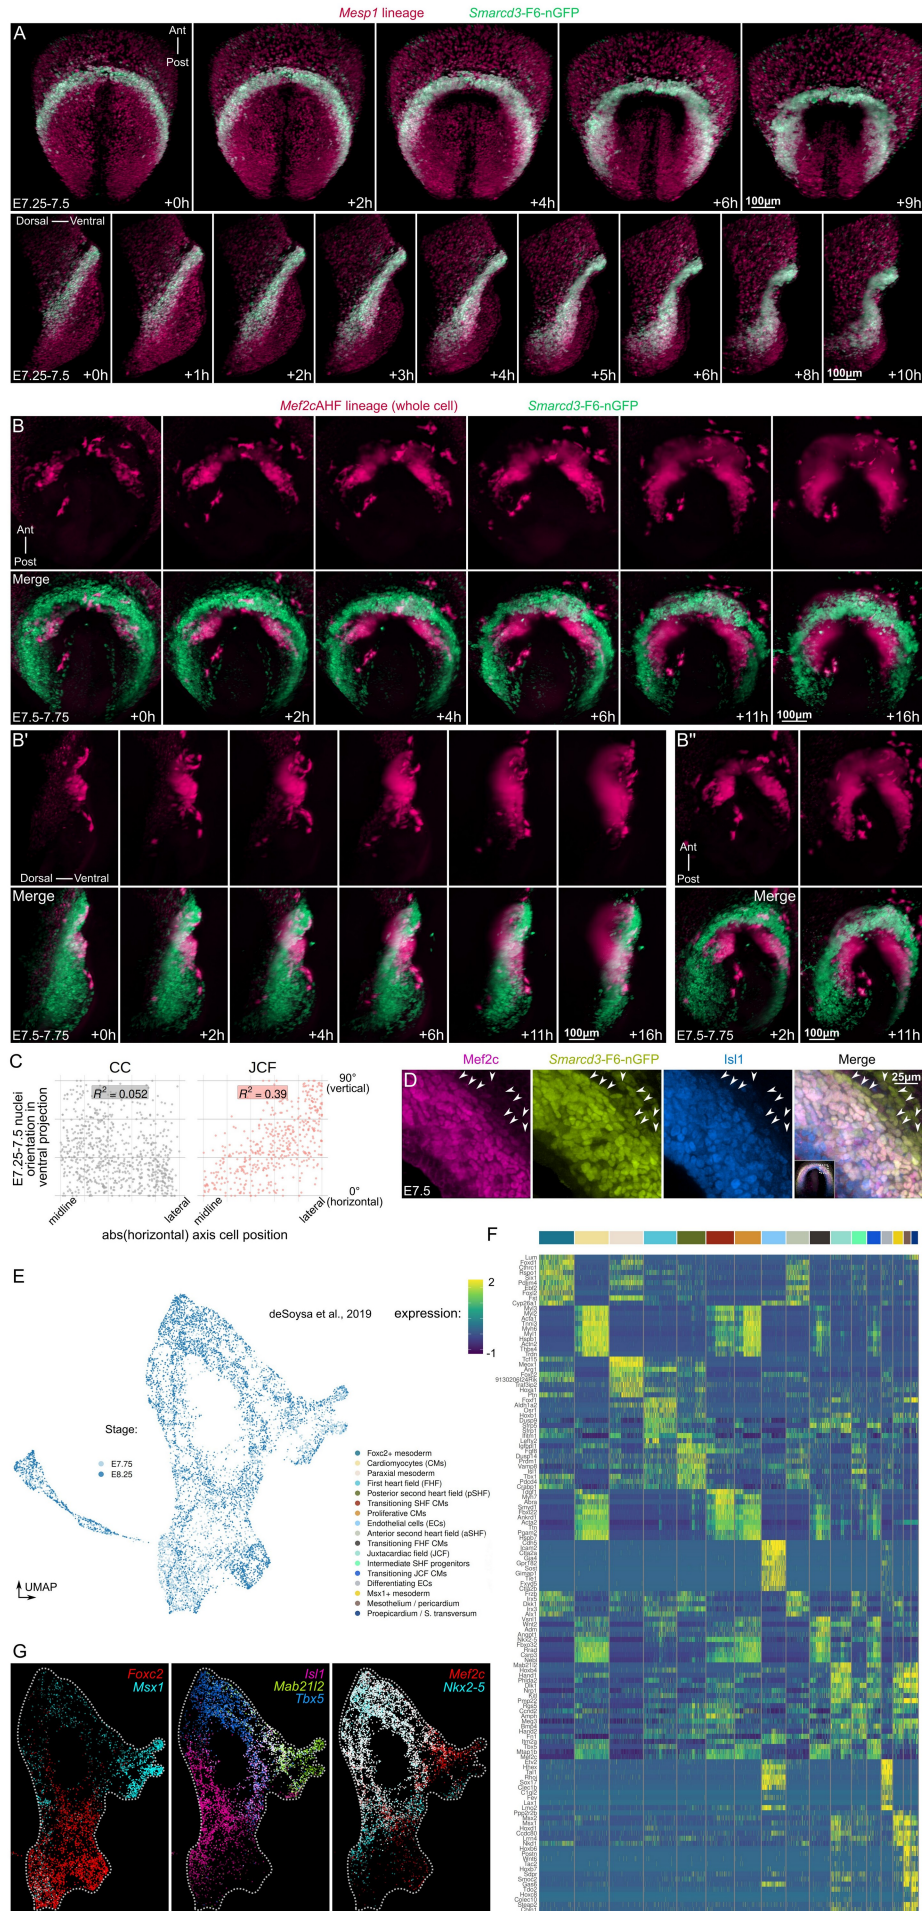

736 Figure S5: Movement of cell populations during crescent MET, related to Figure 5

737 **A.** Time-lapse whole-embryo light sheet imaging starting at E7.25 – E7.5, revealing mesoderm  
738 splitting and the cardiac crescent MET. Top row is ventral maximum projection, bottom row is lateral  
739 partial maximum projection. The image sequence is segmented, tracked, and SVF reconstructions are  
740 analyzed in the accompanying main figure. **B-B''.** Time-lapse whole-embryo light sheet imaging  
741 starting at E7.5 – E7.75, demonstrating the onset of second heart field identity, morphogenesis of the  
742 prospective aortic sac region, and formation of the prospective dorsal mesocardium. Ventral maximum  
743 projection views are shown (**B**), as well as lateral partial maximum projection (**B'**) and oblique frontal  
744 maximum projection (**B''**). **C.** Quantifications of JCF versus CC long-axis orientations of nuclei  
745 (detected with the *Smarcd3*-F6-nGFP reporter) during a collection of E7.25 – E7.5 time lapse series,  
746 using ventral partial maximum projections. Nuclei orientations were plotted as a function of their  
747 medial-lateral position in the crescent. **D.** Examination of JCF cell (arrowheads) molecular identities  
748 during MET of the cardiac crescent in a fixed E7.5 embryo in ventral max projection. **E.** UMAP shown  
749 in Fig. 5F, with superimposed labels corresponding to the stages as named in source publication [39].  
750 **F.** The cluster markers are shown by heatmap. **G.** Notable markers are depicted in qualitative co-  
751 expression feature plots.

752



755 Figure S6: LHT closure by *Isl1*-dependent morphogenetic wave within differentiating SHF progenitors,  
756 related to Figure 6

757 **A-A''**. LSFM examination of fixed embryos at E7.75, immediately prior to LHT formation. Max  
758 projection ventral views are shown (**A**). Midline sagittal plane (**A'**) and two axial planes (**A''** and **A'''**)  
759 are examined in 7.5µm thick slices. Arrowheads in **A-A'''** identify the morphogenetic wave within the  
760 boundary zone between *ISL1* and *NKX2.5* expression. **B-B''**. By scRNAseq [39], we identified the  
761 respective UMAP cluster (**B'**) by qualitative co-expression with *Nkx2-5*, *Isl1*, and *TdGF1* (**B**). **C**.  
762 Differential expression of *TdGF1*+ cluster and the four surrounding clusters, with lowest p-value  
763 differentially expressed genes plotted. **D-E'**. Positive-only (upregulated in *TdGF1*+ cluster) significantly  
764 altered genes were assessed for gene ontology (GO) membership, with the most significant 10  
765 categories shown for cellular component (CC, heatmap in **D**) or biological process (BP, heatmap in **E**).  
766 Six interesting BP terms are inspected by gene membership and log2FC differential expression  
767 (*TdGF1*+ cluster versus four neighbors), as shown in chord plot (**E'**). **F**. The *TdGF1*+ cluster is examined  
768 at E7.75 versus E8.25, with top log2FC positive and negative differentially expressed genes plotted. **G-**  
769 **I''**. Morphologic defects in LHT closure of *Isl1* KO and *Nkx2-5* cKO mice, at indicated stages for  
770 comparison. Ventral max projections are show in **G, H, I**, with cutaway 7.5µm thick ventral view slices  
771 show at indicated depths in **G', G'', H', H'', I', I''**. Arrowheads (**G'', H'', I''**) point to normal dorsal seam  
772 / prospective dorsal mesocardium in control embryos (**G''**), with delayed dorsal closure in *Nkx2-5* cKO  
773 embryos (**H''**), and total absence of morphogenetic wave formation in *Isl1* KO embryos (**I''**).  
774



775 **Figure S7**

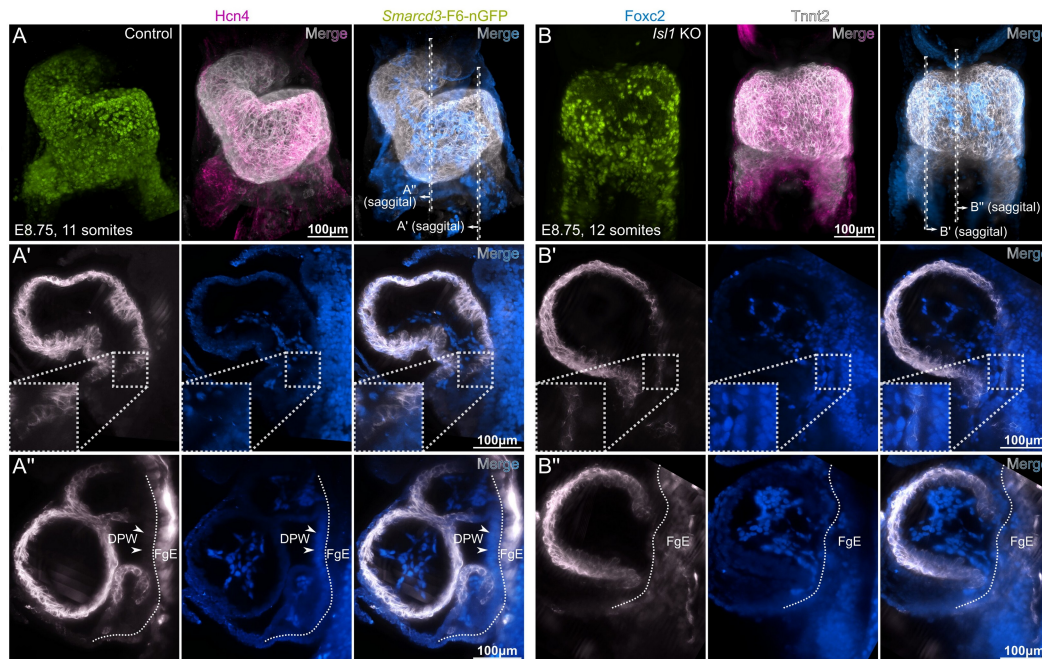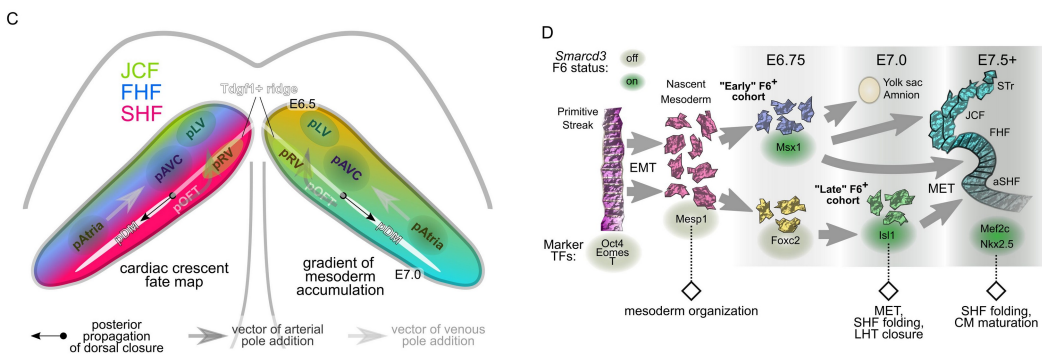

777 Figure S7: *Isl1*-dependent LHT closure and diagonal spatiotemporal gradient of gastrulation, related to

778 Figures 6 and 7

779 **A-B''**. Control (**A-A''**), or *Isl1* KO (**B-B''**) embryos are examined for morphology by LSFM. Ventral view

780 max projections are shown (**A** and **B**), as are 7.5µm thick sagittal cutaways (**A'**, **A''**, **B'**, **B''**) at locations

781 indicated in **A** and **B**. Arrowheads point to dorsal pericardial wall (DPW) in control embryos (**A'**, **A''**),

782 which is missing due to failed LHT closure in *Isl1* KO embryos (**B'**, **B''**). FgE = foregut endoderm. **C**.

783 Spatiotemporal map of early cardiac specification, ventral schematic showing cardiac crescents. Left

784 crescent depicts early cardiac fields, orientation longitudinally along anterior-posterior axis along

785 crescent. Right crescent shows gradient of mesoderm accumulation, with progenitor birthdates (E6.5-  
786 E7.0) labeled at extremes. The *Tdgf1*<sup>+</sup> ridge of transitioning SHF progenitors is shown (gray line),  
787 which forms the entry point for arterial pole addition. Black dot and arrow represent first point of  
788 closure of dorsal mesocardium, an event that propagates posteriorly in crescent (white line). pLV =  
789 prospective LV, pRV = prospective RV, pAVC = prospective AV canal, pAtria = prospective atria, pOFT  
790 = prospective outflow tract, pDM = prospective dorsal mesocardium. **D.** General timeline of cardiac  
791 specification by *Smarcd3*-F6 progenitors. Following EMT during early gastrulation, nascent cells  
792 belong to two cohorts as demarcated by MSX1 and FOXC2 labeling. The early F6<sup>+</sup> cohort, being  
793 already present by E6.75, is mostly made up of MSX1<sup>+</sup> cells, while the late F6<sup>+</sup> cohort is probably a  
794 mixture of MSX1<sup>+</sup> and FOXC2<sup>+</sup> nascent progenitors, favoring the latter. The FHF and SHF undergo  
795 MET, forming the epithelium that folds into the early LHT.

## 796 **Materials and methods**

797

### 798 Study design and method details

#### 799 *Animal Subjects*

800 All mouse protocols were approved by the Institutional Animal Care and Use Committee at UCSF.

801 Mice were housed in a barrier animal facility with standard (12-hour dark/light) husbandry conditions at

802 the Gladstone Institutes. *Smarcd3*-F6-nGFP and *Smarcd3*-F6-CreERT2 mice were described

803 previously [6]. *Mesp1*-Cre knock-in mice [8,43] were obtained from Yumiko Saga. Cre/lox reporter lines

804 RCL-H2B-mCherry and RCL-tdTomato (Ai14) are available at Jackson Laboratory (#023139 and

805 #007914). *Mef2c*AHF-Cre mice were obtained from Brian Black [52]. *Isl1*-Cre and *Nkx2-5*-flox mice

806 are available at Jackson Laboratory (#024242 and #030554). Mice for knockout experiments were

807 maintained on a mixed CD-1 / C57BL/6J background, while control embryos for the majority of live

808 imaging were generated by mating C57BL/6J males to CD-1 females. When indicated in figure panels,

809 multiple reporter and/or mutant alleles may be present in the same embryo(s), either in isolation or in

810 combinations of the following. *Smarcd3*-F6-nGFP refers to *Hipp11*<sup>*Smarcd3*-F6-Hsp68-nGFP/+</sup>. “*Smarcd3*-F6

811 lineage” denotes embryos with *Hipp11*<sup>*Smarcd3*-F6-Hsp68-CreERT2/+</sup>;*Rosa26*<sup>CAG-LSL-tdTomato/+</sup>. “*Mesp1* lineage”

812 denotes embryos with *Mesp1*<sup>Cre/+</sup>;*Rosa26*<sup>CAG-LSL-H2BmCherry/+</sup> or with *Mesp1*<sup>Cre/+</sup>;*Rosa26*<sup>CAG-LSL-tdTomato/+</sup>

813 genotypes. “*Mef2c*AHF lineage” denotes embryos with *Mef2c*AHF-Cre;*Rosa26*<sup>CAG-LSL-tdTomato/+</sup> genotype.

814 “*Mesp1* KO” or “*Mesp1*<sup>-/-</sup>” are embryos with *Mesp1*<sup>Cre/Cre</sup>;*Rosa26*<sup>CAG-LSL-H2BmCherry/+</sup> genotype. “*Isl1* KO”

815 denotes embryos with *Isl1*<sup>Cre/Cre</sup>;*Rosa26*<sup>CAG-LSL-tdTomato/+</sup> genotype, for which matched controls are either

816 *Isl1*<sup>Cre/+</sup>;*Rosa26*<sup>CAG-LSL-tdTomato/+</sup> (where *Isl1* lineage is quantified), or *Isl1*<sup>+/+</sup> (where *Isl1* KO is compared

817 with other mutants). *Nkx2-5* cKO refers to embryos with *Mesp1*<sup>Cre/+</sup>;*Nkx2-5*<sup>flox/flox</sup> genotype, for which

818 matched controls are *Mesp1*<sup>Cre/+</sup>;*Nkx2-5*<sup>+/+</sup>. Following set up of timed matings, the day of copulatory

819 plug is designated as E0.5. For each embryological process we wished to study, we imaged 3-4

820 embryos by time lapse LSFM, though we chose only those with the highest imaging quality for further

821 analysis. In this work, we thus present only phenomena that were clearly reproduced over many  
822 embryos, on both subjective and quantitative bases.

| Mouse strains                     |                    |                     |
|-----------------------------------|--------------------|---------------------|
| Mouse: <i>Mesp1</i> -Cre          | Saga Laboratory    | Saga et al., 1999   |
| Mouse: RCL-H2B-mCherry            | Jackson Laboratory | cat: 023139         |
| Mouse: <i>Smarcd3</i> -F6-nGFP    | Bruneau Laboratory | Devine et al., 2014 |
| Mouse: RCL-tdTomato (Ai14)        | Jackson Laboratory | cat: 007914         |
| Mouse: <i>Smarcd3</i> -F6-CreERT2 | Bruneau Laboratory | Devine et al., 2014 |
| Mouse: <i>Mef2c</i> AHF-Cre       | Black Laboratory   | Dodou et al., 2004  |
| Mouse: <i>Isl1</i> -Cre           | Evans Laboratory   | Cai et al., 2003    |
| Mouse: <i>Nkx2-5</i> -flox        | Jackson Laboratory | cat: 030554         |

823

#### 824 *Whole embryo dissection and culture conditions*

825 Pregnant dams were sacrificed on the day of the experiment, per institutional IACUC standard  
826 procedure, and were immediately dissected, with uterus transferred to warm DMEM/F-12 with HEPES  
827 and without phenol red. Gestational sacs were transferred to 37°C dissection medium (DMEM/F-12 w/  
828 HEPES and w/o phenol red, 10% heat-inactivated fetal bovine serum, 1X penicillin-streptomycin, 1X  
829 ITS-X, 1X GlutaMAX, as well as 8 nM  $\beta$ -estradiol, 200 ng/ml progesterone, 25  $\mu$ M N-acetyl-L-cysteine  
830 as per [53]) in small batches (4-5 per 6cm round bottom dish). While maintaining 37°C as best as  
831 possible, embryos were microdissected using fine forceps, and were transferred to 37°C culture  
832 medium (identical to dissection medium except with 50% of DMEM/F12 volume replaced by heat-  
833 inactivated rat serum, resulting in final 42.5% rat serum) using low-retention wide orifice pipette tips.  
834 Embryos were screened for reporter expression and morphology using a standard fluorescence  
835 dissection microscope (Leica). Embryo stage was determined with standardized methods [6], including  
836 the use of mouse embryo atlases, in combination with operator judgement for finely granular  
837 assessments.

838

#### 839 *Embryo preparation for live LSM*

840 Embryos were maintained in culture medium at 37°C and 5% CO<sub>2</sub> until live imaging began. At the time  
841 of imaging for embryos at E7.5 and beyond, culture medium was supplemented with 2µM CB-DMB to  
842 decrease (but not obliterate) motion artifact from beating due to its activity on Ncx1 channels [54], for  
843 which genetic loss results in normal development with structurally normal hearts until at least E8.5  
844 [55,56]. Before mounting, glass capillaries were pre-filled with liquid embedding medium (1.5%  
845 agarose, 3% gelatin in PBS, microwaved and mixed until fully melted) and pistons were inserted, then  
846 allowed to cool to ~35°C before use. Using a stereoscopic dissection microscope (Leica), each free  
847 end (opposite the piston rod) of the embedding mix was extruded and 25-30% of its was length  
848 trimmed with a dissection forceps. Each embryo was attached by pushing its ectoplacental cone into  
849 the partially-gelled column. After confirming good attachment, the embryo and a small volume of  
850 surrounding culture medium were drawn inside the capillary and parked about 4-5mm from the open  
851 end. Capillaries were maintained at 37°C as best as possible until imaging.

| <b>Reagents for live imaging</b>     |                   |                      |
|--------------------------------------|-------------------|----------------------|
| Low MP agarose                       | Fisher            | BP165-25             |
| Gelatin                              | Sigma             | G1890                |
| Rat Serum, special collection        | Valley Biomedical | AS3061-SC            |
| Fetal bovine serum                   | ThermoFisher      | 10082139             |
| DMEM/F-12                            | ThermoFisher      | 11039021             |
| GlutaMAX                             | ThermoFisher      | 35050061             |
| ITS-X                                | ThermoFisher      | 51500056             |
| Penicillin/Streptomycin              | ThermoFisher      | 15070063             |
| b-estradiol                          | Sigma             | E8875                |
| Progesterone                         | Sigma             | P3972                |
| N-acetyl cysteine                    | Sigma             | A7250                |
| CB-DMB                               | Sigma             | C5374                |
| Glass capillary and piston, largest  | Sigma             | Z328510 and BR701934 |
| Glass capillary and piston, large    | Sigma             | Z328502 and BR701938 |
| Glass capillary and piston, small    | Sigma             | Z328480 and BR701932 |
| Glass capillary and piston, smallest | Sigma             | Z328472 and BR701930 |
| Wide orifice low-retention tips      | Rainin            | 30389197             |

852

853 *Live LSFM imaging (Fig. 1A)*

854 Lightsheet Z.1 (Zeiss) with incubation and dual pco.edge 4.2 cameras (PCO) was configured prior to  
855 embryo harvest, using a 20X/1.0 plan apochromat water-dipping detection objective with refractive  
856 index correction collar set to  $n=1.38$ , dual 10X/0.2 illumination objectives, and tank pre-filled with  
857 culture medium as described above at 37°C and 5% CO<sub>2</sub>. Embryo capillaries were auditioned for  
858 imaging quality and position, and chosen embryos subjected to 9-24 hours of LSFM imaging using our  
859 Zeiss Lightsheet Adaptive Position System (ZLAPS), linked in the key reagent table. ZLAPS is a user-  
860 friendly AutoIT GUI application that interfaces with ZEN, using multiview acquisition settings  
861 established by the user. We typically used 2-3 frontal views with 72° - 110° offsets, and collected  
862 GFP/488nm/505-545nm and RFP/561nm/570+ nm channels simultaneously. ZLAPS captures new  
863 images at fixed time intervals (specified by the user), and calls ImageJ with the Java SIFT [57] plugin  
864 to register sequential acquisitions. The registration matrix outputted by SIFT (for each view) is used to  
865 adjust (with hysteresis and over-correction mitigation) the stage position of the Z.1 for subsequent  
866 acquisitions. For long-term imaging (24hr+), additional optimizations are necessary: light sheet  
867 alignment is checked and manually adjusted every 4-6 hours, piston rods are secured with Parafilm,  
868 the specimen tank/chamber cover is used, and additional sterile water and/or culture medium is  
869 trickled/dripped (< 0.5mL/hour) into the tank using a micro-osmotic pump to overcome evaporation  
870 losses.

871

#### 872 *Whole mount preparation for fixed LSFM imaging*

873 Embryos were harvested as for live imaging, except uterus was transported and dissected in ice cold  
874 PBS. Embryos were fixed in 4% paraformaldehyde for 1 hour at room temperature with gentle  
875 agitation, and washed briefly in PBS before being transferred to short-term storage at 4°C in PBS with  
876 0.2% sodium azide. For immunostaining, embryos were transferred individually to wells of PCR tube  
877 strips. E9.5 embryos were cleared briefly in 8% SDS in 200mM borate buffer [58], with gentle agitation  
878 for a few hours at 37°C until clear, followed by 2-3 washes in PBS at 37°C. Smaller embryos were not  
879 subjected to clearing. Subsequently, embryos were incubated in blocking solution (PBS with 5%

880 normal donkey serum, 0.2% sodium azide, and 0.5% TX-100 for E5-E7 embryos, 0.65% for E7-E8,  
881 0.8% for E9) plus 100µg/mL of unconjugated Fab fragment donkey anti-mouse, for 2 hours at 37°C  
882 with gentle rocking/rotation. After washing in PBS, primary staining was performed in blocking solution  
883 overnight, followed by additional washing. Secondary incubation was performed in blocking solution for  
884 2-3 hours, followed by final washing, with all steps at 37°C with gentle rocking/rotation. For storage at  
885 4°C until mounting, labeled E6-E7 embryos were sunk in 40% glycerol in PBS, while older embryos  
886 were kept in PBS.

| <b>Antibodies</b>                                                                  |                        |                |
|------------------------------------------------------------------------------------|------------------------|----------------|
| tdTomato (rabbit polyclonal)                                                       | Rockland               | 600-401-379    |
| multi-RFP 5F8 (rat monoclonal)                                                     | Allele Biotechnology   | ACT-CM-MRRFP10 |
| Cre (rabbit polyclonal)                                                            | Millipore              | 69050          |
| GFP (chicken polyclonal)                                                           | Aves                   | GFP-1020       |
| Foxc2 (sheep polyclonal)                                                           | R&D                    | AF6989         |
| Nkx2.5 (goat polyclonal)                                                           | Santa Cruz             | sc-8697X       |
| Isl1 (rabbit polyclonal)                                                           | Abcam                  | ab-109517      |
| Mef2c (sheep polyclonal)                                                           | R&D                    | AF6786         |
| Cd31 (hamster monoclonal)                                                          | Bio-Rad                | MCA1370Z       |
| Tnnt2 Ab-1 (mouse monoclonal)                                                      | Thermo Scientific      | MS-295-P       |
| Hcn4 (rabbit polyclonal)                                                           | Alome                  | APC-052        |
| Msx1 (goat polyclonal)                                                             | R&D                    | AF5045         |
| pHH3 HTA28 (rat monoclonal)                                                        | Biologend              | 641002         |
| Fab fragment donkey anti-mouse                                                     | Jackson Immunoresearch | 715-007-003    |
| Dy405, AF488, Cy3, AF647, AF680 Secondary antibodies (donkey polyclonal whole IgG) | Jackson Immunoresearch | various        |

887

### 888 *Fixed LSM imaging*

889 Embedding medium (2% agarose in PBS) was melted in a microwave and cooled to 35°C, when  
890 embryo(s) were immersed for 30 seconds with gentle mixing. Glass capillaries were partially filled with  
891 liquid embedding medium, and their pistons were retracted to pick up embryos. Following cooling and  
892 gelling of the embedded embryos, capillaries were taped to the inside walls of polystyrene tubes, and  
893 specimens were extended into room-temperature immersion medium (EasyIndex OCS for E8+

894 embryos, or 40% glycerol for E6-E7 embryos) for overnight equilibration. Specimens were imaged on  
895 Lightsheet Z.1 (Zeiss) with dual pco.edge 4.2 cameras (PCO) for simultaneous two-channel  
896 acquisition using standard illumination lasers (405nm, 488nm, 561nm, 638nm). Rarely, channel bleed  
897 necessitated later subtraction during processing. Three views were acquired from the ventral aspect of  
898 each specimen at 72° (E7.5+) or 90° (E6.5-E7.25) offsets, using 20X/1.0 plan apochromat water-  
899 dipping detection objective at n=1.38 for 40% glycerol immersion (mated with 10X/0.2 “LSFM”  
900 illumination objectives), or 20X/1.0 plan neofluar clearing dipping objective at n=1.45 for EasyIndex  
901 OCS immersion (mated with 10X/0.2 “LSFM clearing” illumination objectives).

| <b>Reagents for fixed imaging</b> |                                 |              |
|-----------------------------------|---------------------------------|--------------|
| EasyIndex OCS                     | LifeCanvas                      | EI-Z1001     |
| PFA 16%                           | Electron Microscopy Sciences    | 15710        |
| Triton X-100 “TX-100”             | Sigma                           | X100-500ML   |
| SDS 20%                           | Research Products International | L23100-500.0 |

902

### 903 *Computer hardware and software environment*

904 ZEN and Lightsheet Z.1 acquisitions were run on a Zeiss-supplied workstation with dual 8-core 2<sup>nd</sup>  
905 generation Intel Core based Xeon processors and 96GB RAM, running Windows 7. Data was  
906 processed on workstations with either single 8-core 10<sup>th</sup> generation or dual 8-core 3<sup>rd</sup> generation Intel  
907 Core based Xeon CPUs, 128GB RAM, and 4GB Nvidia GTX 1650 GPUs, running Kubuntu 20.04 LTS  
908 with Nvidia driver 470, Fiji v2.1.1, Python 3.8.10, Perl 5.30.0, and CUDA toolkit 11.1. All software-  
909 comparative benchmarks were run on the same system. Accuracy evaluations between TGMM  
910 versions were performed by running each version with its optimized parameter set (determined  
911 empirically through iterative comparison), followed by import to MaMuT. Random subsets of cells,  
912 tracks, and divisions were assessed in single and double-blinded fashion, with annotations made and  
913 counted using MaMuT Perl scripts. Single cell RNAseq analysis was performed on similar hardware  
914 running Kubuntu, RStudio desktop build 443, r-base 4.1.3, Seurat 4.0.6 [59], topGO 2.48.0, and  
915 GOplot 1.02.2 [60].



916

917

918 *Raw image processing and single view deconvolution (Fig. 1B)*

919 ZEN-generated .czi files were handled with our CZI LSFM Processing Scripts (see Software table in  
920 Materials and methods) in Fiji [34]. The initial step (“deconvolve .czi files”) batch processes live or fixed  
921 raw data. First, a theoretical point spread function (PSF) is generated, based on illumination and  
922 detection parameters (as the intersection of Gaussian light sheet with modeled widefield detection)  
923 embedded in Zeiss metadata, with an optional detection NA penalty for the improved aberration  
924 handling. Each channel of each view is deconvolved for each timepoint, using a closed form solution  
925 with Tikhonov regularization [33]. We had determined this approach was the best balance of result  
926 quality and computational intensiveness, following extensive empirical testing and benchmarking with  
927 a wide range of fixed and live samples. After .tif files are written for each channel, view, and timepoint,  
928 additional automated filtering (“filter LSFM .tif files”) is performed that can include (by user preference)  
929 background subtraction deblurring, bright blob and/or precipitate removal, bit depth compression, z-  
930 stack depth equalization (needed for BigStitcher), and/or maximal intensity projection export. Because  
931 the many serially-performed functions have user-controllable settings, changes or alterations to the  
932 output images may be somewhat unpredictable or unnatural. For new experiments, we recommend a  
933 trial-and-error approach to determine the best protocol. We typically handled fixed image datasets at  
934 16-bit depth with maximal automated filtering including bright blob removal (helpful for deep max Z  
935 projections in whole mount IHC), although frequent artifacts remain. Live datasets, on the other hand,  
936 were usually contrast-enhanced uniformly across each entire 4d stack, then range-compressed to 8-  
937 bit.

938

939 *Multiview alignment and fusion (Fig. 1C)*

940 After deconvolution and filtering, resultant .tif files were imported into BigStitcher [28], using its  
941 automatic loader. “Interest points” were detected within one or more channels, across all views and  
942 timepoints, and views were registered in 3d followed by 4d space. The most optimal solution for live

943 datasets resulted from pre-registration using a “Fast Descriptor-Based” method in 3d then 4d, followed  
944 by drift mitigation in time with a “Center-of-mass” method, followed by “Fast Descriptor-Based” or  
945 “Precise descriptor-based” methods on the whole dataset and in regions of difficulty. Finally, multiple  
946 “Iterative closest point” steps were used to improve upon remaining view-to-view and timepoint-to-  
947 timepoint offsets. Multiview fusion was performed using optimized “lightweight” content-based fusion,  
948 coded within our fork of BigStitcher’s multiview-registration plugin (see Software table within Materials  
949 and methods). Other advantages of our forked plugin include fusion in multiple axes, and use of an  
950 arbitrary z-anisotropy factor (we use 4). Following fusion into single image volumes, datasets can be  
951 viewed in BigDataViewer in Fiji, or can be further processed in batch using additional components of  
952 our CZI LSFM Processing Scripts. This includes automated generation of oblique 3d projections, as  
953 well as single-channel anaglyphs (Video S7).

954

#### 955 *F-TGMM v2.5*

956 Tracking with Gaussian Mixture Models (TGMM) 1.0 [61], and its successor TGMM 2.0 [29], are open-  
957 source packages for analysis of large-scale time-lapse cellular imaging. With linear best-fit modeling  
958 (from one timepoint to the next) of a whole-specimen Gaussian mixture, TGMM is fast and accurate. It  
959 is written in C++, and utilizes GPU/GPGPU acceleration in CUDA to perform several critical steps.  
960 TGMM’s accuracy owes itself to several factors: 1. watershed hierarchical segmentation for identifying  
961 3d supervoxels (i.e. Gaussians / prospective cells) – which is superior to a difference-of-gaussians  
962 approach as in Trackmate [62]; and 2. the implementation of “temporal logical rules,” which build on  
963 the linear model by extending false cell deaths, and connecting new births to prospective division  
964 parents. We modified TGMM to enhance its performance of with our data. First, over- and under-  
965 segmentation were improved by applying dynamic rather than static “background subtraction” to the  
966 input images, using Gaussian-blurring (user configurable) to define background. Second, we  
967 liberalized the dead cell extension rules to further improve linkage across time. Third, we re-wrote the  
968 cell division classifier, which was constrained to calling ‘yes’ or ‘no’ on division trios already assigned

969 by the linear model. Instead, our new classifier incrementally improves division linkage accuracy by  
970 sampling trios in the neighborhood of each new birth, and assigning scores to each one. Fourth, we  
971 re-wrote the main tracking loop to eliminate repeat calls to hierarchical segmentation for the same  
972 image, instead caching the result within the temporal window (usually  $\pm 5$  timepoints) for re-use. Last,  
973 we fixed a number of bugs, streamlined the code's output to stdout, and made updates necessary for  
974 compiling and running on contemporary CUDA hardware and software. Overall, a complete TGMM  
975 v2.5 run is typically 30% faster than TGMM 2.0, and produces more accurate results. Regrettably,  
976 division classification is still suboptimal even with the above improvements and iterative training of the  
977 classifier. Notably, we could not run the convolutional neural network (CNN) division detector included  
978 with TGMM 2.0 [29] outside of its Docker container, and even there it produced extremely poor results  
979 with our datasets. Much work remains in the arena of automated division detection, including not just  
980 the identification of division events, but in linking the correct daughter pair to each mother.

981

#### 982 *Tracking at single cell resolution (Fig. 1D)*

983 Fused image volumes of *Mesp1* lineage, from either the front or side view of each embryo, were used  
984 as input for tracking. A python script "bdv\_export\_all\_h5\_to\_klb\_pyklb.py," included with F-TGMM v2.5,  
985 converts the fused output from .h5 format to .klb format [29], making it compatible for input with both  
986 BigDataViewer and F-TGMM. The empirically-determined optimal F-TGMM configuration parameters  
987 used on our datasets are provided in the below table. ProcessStack was run individually (scripted for  
988 batch processing) for watershed segmentation of each timepoint's fused volume, followed by a single  
989 TGMM call on the entire dataset. Rare, sporadic, dropout of cell linkages were corrected on the  
990 resulting TGMM .xml data using a perl script "XMLfinalResult\_fix\_cell\_NaNs.pl."

| Parameter                             | TGMM 2.0 | F-TGMM v2.5 |
|---------------------------------------|----------|-------------|
| backgroundThreshold                   | 5        | 5           |
| radiusMedianFilter                    | 2        | 2           |
| sigmaGaussianBlurBackground           | N/A      | 20          |
| useBlurredImageForBackgroundDetection | N/A      | 0.7         |
| weightBlurredImageSubtract            | N/A      | 0.6         |

|                                                    |           |                |
|----------------------------------------------------|-----------|----------------|
| minTau                                             | 0         | 0              |
|                                                    |           |                |
| persistenceSegmentationTau                         | 1         | 1              |
| betaPercentageOfN_k                                | 1.6       | 2.5            |
| nuPercentageOfN_k                                  | 0.5       | 0.1            |
| alphaPercentage                                    | 0.85      | 0.75           |
| maxIterEM                                          | 50        | 50             |
| tolLikelihood                                      | 1e-6      | 1e-6           |
| regularizePrecisionMatrixConstants_lambdaMin       | 0.05      | 0.02           |
| regularizePrecisionMatrixConstants_lambdaMax       | 0.8       | 0.8            |
| regularizePrecisionMatrixConstants_maxExcentricity | 16.0      | 16.0           |
| temporalWindowForLogicalRules                      | 5         | 5              |
| SLD_lengthTMthr                                    | 5         | 5              |
| conn3D                                             | 74        | 74             |
| minNucleiSize                                      | 1600      | 1200           |
| maxNucleiSize                                      | 20000     | 10000          |
| maxPercentileTrimSV                                | 0.55      | 0.8            |
| conn3DsvTrim                                       | 6         | 6              |
| maxNumKNNsupervoxel                                | 10        | 10             |
| maxDistKNNsupervoxel                               | 40        | 40             |
| thrSplitScore                                      | -1        | -1             |
| thrCellDivisionPlaneDistance                       | 14        | 14             |
| cellDivisionClassifierMethod                       | AmatF2013 | DominguezM2021 |
| thrCellDivisionWithTemporalWindow                  | 0.45      | 0.45           |

991

992 *Mining and analysis of tracking data (Fig. 1E)*

993 F-TGMM writes .xml tracking solutions, representing the linkages that connect each cell to its past and

994 future self across time. These tracks can be imported directly into MaMuT [30], a Fiji plugin for

995 annotation and visualization of big datasets. Our fork of the MaMuT plugin (see Software table in

996 Materials and methods) contains fixes to the TGMM import code, enables track vector viewing in 2d,

997 and makes a number of improvements in MaMuT's 3d viewer for better performance with large

998 datasets, although this feature was recently removed in the upstream mainline repository. Moreover,

999 we have written a large compendium of scripts in Perl for filtering, labeling, subsetting, motion

1000 subtracting, merging, analyzing, and exporting from MaMuT datasets, the features of which are not

1001 available in the mainline plugin. These scripts were employed in various operational workflows, for

1002 generating the many viewable and analyzable MaMuT datasets presented in this work. Lastly, we  
1003 updated the SVF package [29] with bug fixes and for use with Python3. Where indicated, we  
1004 processed TGMM data with SVF to generate long-running vector fields of the dataset for morphometric  
1005 assessment, which facilitated an overall understanding of tissue deformation during heart  
1006 development. When individual tracks at single-cell resolution were desired (SVF not indicated), we  
1007 typically filtered datasets for tracks of 2-4 hour minimum length, without abrupt unnatural movements,  
1008 and occasionally would manually remove tracks not belonging to the cell type of interest. Starting with  
1009 a MaMuT .xml dataset (derived either directly from TGMM or via SVF), included scripts facilitate export  
1010 of spacetime coordinates for each track, which were summarized for statistical analysis in spreadsheet  
1011 software or R.

1012

### 1013 *Single cell RNAseq analysis*

1014 Single cell wild-type datasets [39,54] were downloaded from public repositories, and analyzed in  
1015 Seurat [59] v4.0. We tailored the dataset normalization and integration method (CCA, SCTransform) to  
1016 specific batch effects and coalescence of like clusters in UMAP space. Initial QC cleanup involved  
1017 removal of low quality cells, and those belonging to either endoderm or ectoderm lineages.  
1018 Subsequent clusters were subsetted to depict only pre-cardiac mesoderm and its derivatives. All  
1019 differential gene expression analysis was performed with FindMarkers in Seurat, and lists of  
1020 differentially-expressed and non-differentially-expressed genes were inputted into topGO for gene  
1021 ontology analysis. Pearson correlation was performed on normalized RNA count data. Result  
1022 visualization was scripted with ggplot2, Seurat, GOplot [60], and/or igraph. Qualitative co-expression  
1023 feature plots were generated by overlay and assignment of individual feature plots to different channels  
1024 in Fiji. A single cell *Mesp1* KO dataset was generated for a companion manuscript (Krup et al.,  
1025 manuscript in preparation), and was analyzed for differential expression of select features relevant to  
1026 directional migration of mesoderm [45] and related signaling.

1027

1028

1029 Data analysis

1030 *Mesoderm accumulation*

1031 Using direct TGMM imported data and MaMuT scripts, we parsed each embryo (E6.5 – E7.0) into 9  
1032 bins comprised of a 3 x 3 rectangle box pattern as seen in the lateral view, and filtered for QC as  
1033 described above. For quantification smoothing, each box shares an overlap of 50% of the nearest  
1034 tracks in each adjacent neighboring box(es). Track birthdate is the timepoint of first appearance of the  
1035 track. Track density, for each cell within a bin, is the number of other cells present within a radius  
1036 spanning 12 times the radius of that cell. Track motility was computed as the average of all moving  
1037 window velocities for a discrete time span (i.e. 30 minutes), incremented each frame over the life of  
1038 that track. SVF analysis was performed for tissues (i.e. embryonic mesoderm and extraembryonic  
1039 mesoderm) assigned and painted within SVF's tissue-bw script. Track mean velocity is the total  
1040 distance traveled divided by the total time span of the track, and is of particular use with SVF analyses.  
1041 Mean comparisons were based on Welch t-test.

1042

1043 *Assessments of cell neighbor relationships and mixing*

1044 For quantification of separation after cell division, an empty MaMuT dataset was manually annotated  
1045 with division nodes and daughter tracks derived from a random assortment of such events in each  
1046 fused BigDataViewer dataset. Using a custom Perl script to analyze the MaMuT datasets, mother and  
1047 daughter positions were exported into a table. Raw measurements were also indexed to a singular  
1048 length of an average embryo from this stage. For quantification of track position exchanges, we  
1049 separated each embryo into two bins by cell proximal-distal position, then again by lateral half,  
1050 resulting in four bins for analysis. We used a custom Perl script to analyze tracks in pairwise fashion  
1051 within the MaMuT datasets, bounded by time and cell distance cutoffs as specified by user (here, co-  
1052 existent tracks were admitted until t+4.5h into the dataset, and rejected if they were separated by more  
1053 than 250µm distance in the axis of analysis). Each pair is assessed for its distance offset in the

1054 dimension of interest, and those distances can be compared over time to determine whether the tracks  
1055 exchange position in that dimension. End offsets were first plotted as a function of begin offset, and  
1056 the relationship was assessed by Pearson correlation coefficient  $R^2$ . Next, the offsets were followed in  
1057 time to determine the number of position exchanges along the axis, and the average number was  
1058 plotted for each bin and axis. All mean comparisons as described above were made by Welch t-test.

1059

#### 1060 *Birth of Smarcd3-F6 progenitors*

1061 In order to bin tracking results by *Smarcd3-F6* status, F-TGMM tracking solutions for *Mesp1* lineage  
1062 progenitors at E7.0 were processed with SVF, using the *Smarcd3-F6-nGFP* channel as a mask for  
1063 tissue-bw. When tissue-bw was performed for early (forward propagation) and late (backwards  
1064 propagation) timepoints, different sets of tracks were included in the F6<sup>+</sup> pool, though late tracks  
1065 almost always included early tracks as a subset. Using MaMuT Perl scripts, we subtracted the early  
1066 tracks from the late tracks, and colored all tracks by F6 status: off, on early, or on late (which included  
1067 the vast majority of on early tracks). Complete painted solutions were visualized with MaMuT. They  
1068 were also subjected to uniform sparsification (via Perl script) and plotted as orthographic projections to  
1069 depict characteristic migration patterns.

1070

#### 1071 *Cell fates of the Smarcd3-F6 lineage*

1072 Lineage analysis was carried out in fixed embryos imaged by LSFM as described above. Using fused  
1073 image volumes, we attempted to count all cells in all embryos, assigning them to myocardial or non-  
1074 myocardial structures. Comparison of their mean contributions to various structures was made by  
1075 Welch t-test.

1076

#### 1077 *Counting Mesp1 lineage and Smarcd3-F6 progenitors*

1078 Counts of *Mesp1* lineage progenitors were made using live LSFM datasets that had been tracked with  
1079 F-TGMM, using the number of tracked cells at corresponding timepoints as the initial estimate. Those

1080 estimates were further refined by subtracting estimated incidentally-labeled cells (i.e. endoderm, etc).  
1081 *Smarcd*-F6-nGFP counts were made by performing background subtraction in Fiji with kernel size 50,  
1082 then by examining corresponding timepoints with Trackmate's DoG detector with radius 15 and  
1083 threshold 5. Density of the DoG detection solution was determined by counting number of cells within  
1084 an arbitrary radius of each cell (i.e. 20 $\mu$ m).

1085

#### 1086 *Cell morphometry during cardiac crescent MET*

1087 The volume of *Smarcd3*-F6 progenitors was estimated using a custom ImageJ macro, which evaluated  
1088 *Smarcd3*-F6-nGFP and whole-cell tdTomato (*Mesp1* lineage) for a number of timepoints. In brief, the  
1089 macro performs dilate alterations and background thresholding on the nGFP channel to create  
1090 "spheres of influence" around each cell, which are then used as an intersect mask with the tdTomato  
1091 channel. The intersection is measured for integrated intensity, which is divided by the estimated  
1092 number of cells to yield estimated cell volume. Thickness of the overall crescent was estimated with  
1093 manual measurements taken in sagittal plane slices. Cell density is summated for each cell as the  
1094 number of cell neighbors within a stated radius, which is then averaged at individual time lapse frames  
1095 near stated timepoints.

1096

#### 1097 *Quantifying movement behavior of the heart fields*

1098 After cardiac crescent MET, tissues and their descendant structures are revealed morphologically,  
1099 allowing for F-TGMM tracking solutions to be subsetted into those constituent tissues via SVF. The  
1100 tracks' beginnings were tracked in reverse (i.e. via backward propagation), allowing for an assessment  
1101 of sites of origin of the three layers principal layers derived during MET (pericardial, myocardial, and  
1102 endocardial). Myocardial and pro-epicardial fields were analyzed for net track displacement, which  
1103 could be assayed with or without the application of correction for (i.e. subtraction of nearby) endoderm  
1104 movement by MaMuT Perl script. Endoderm correction was especially helpful during foregut folding  
1105 and involution. For JCF position and motility assessments, we manually quantified F6<sup>+</sup> cells in maximal



1106 z projections, because SVF agglomerates movements into vector fields, destroying nonuniform motility.  
1107 Nuclei orientations were compared using Watson  $U_2$  test, whereas all other measurements were  
1108 compared as means by Welch t-test.

1109

#### 1110 *Comparing Mesp1 mutants with controls*

1111 Since we had already determined that mesoderm accumulation occurs by diagonal spatiotemporal  
1112 gradient, we compared cells from mutant and control embryos by assigning them to a position along  
1113 that axis (rather than by membership to 3 x 3 spatial grids). We applied similar metrics utilized  
1114 previously. Motility was computed as the average displacement sampled over 30-minute moving  
1115 windows, and cell density as the average number of other cells counted within a 12-nuclei-radius from  
1116 each cell. Additionally, track trajectories were scored in the lateral view, using the start and end  
1117 coordinates to determine the directionality (in the orthographic lateral view). Trajectory angles (anterior  
1118 at 0°, proximal at 90°) were calculated for each track in the orthographic lateral view, using a 2d vector  
1119 from its start coordinate to end coordinate. Density distributions of all trajectory angles were plotted in  
1120 polar space, and were compared with Watson  $U_2$  tests. All other measurements were compared as  
1121 means by Welch t-test.

1122

1123

#### 1124 Data and software

1125 All software utilized to handle images, generate and process tracking solutions, and export data tables  
1126 for analysis with R are available on Github, as listed below. Source data tables and R scripts used to  
1127 generate individual figure panels are freely available from the authors upon request.

| Software             |                       |                             |
|----------------------|-----------------------|-----------------------------|
| Seurat 4.0 (R 4.0)   | Satija Lab            | Hao et al., 2021            |
| ggplot2 (R 4.0)      | RStudio               | Wickham, 2016               |
| TopGO 2.48.0 (R 4.0) | Alexa and Rahnenfuher | Alexa and Rahnenfuher, 2022 |
| GOPLOT 1.0.2 (R 4.0) | Ricote Lab            | Walter et al., 2015         |

|                                                    |                                              |                                                                                                                                                                                                                   |
|----------------------------------------------------|----------------------------------------------|-------------------------------------------------------------------------------------------------------------------------------------------------------------------------------------------------------------------|
| F-TGMM v2.5                                        | This paper (e) and Fernando Amat             | <a href="https://github.com/mhdominguez/F-TGMM">https://github.com/mhdominguez/F-TGMM</a>                                                                                                                         |
| ZLAPS (ZEN lightsheet adaptive positioning system) | This paper (a)                               | <a href="https://github.com/mhdominguez/ZLAPS">https://github.com/mhdominguez/ZLAPS</a>                                                                                                                           |
| TGMM2SVF                                           | This paper (g) and Leo Guignard              | <a href="https://github.com/mhdominguez/SVF">https://github.com/mhdominguez/SVF</a>                                                                                                                               |
| SVF2MaMuT                                          | This paper (g) and Leo Guignard              | <a href="https://github.com/mhdominguez/SVF2MaMuT">https://github.com/mhdominguez/SVF2MaMuT</a>                                                                                                                   |
| Fiji (base ImageJ v1.53f)                          | Schindelin, Rueden, Rasband, et al.          | Schindelin et al., 2012                                                                                                                                                                                           |
| - PSF Generator                                    | Biomedical Imaging Group at EPFL             | <a href="http://bigwww.epfl.ch/algorithms/psfgenerator/">http://bigwww.epfl.ch/algorithms/psfgenerator/</a>                                                                                                       |
| - Parallel Spectral Deconvolution                  | Piotr Wendykier                              | <a href="https://sites.google.com/site/piotrwendykier/software/deconvolution/parallelspectraldeconvolution">https://sites.google.com/site/piotrwendykier/software/deconvolution/parallelspectraldeconvolution</a> |
| - CZI LSFM Processing Scripts                      | This paper (b and d)                         | <a href="https://github.com/mhdominguez/LSFMProcessing">https://github.com/mhdominguez/LSFMProcessing</a>                                                                                                         |
| - BigStitcher                                      | This paper (c) and Preibisch Lab             | Fiji update repositories and <a href="https://github.com/mhdominguez/multi-view-reconstruction">https://github.com/mhdominguez/multi-view-reconstruction</a>                                                      |
| - KLB file format                                  | Keller Lab                                   | McDole et al., 2018 and Fiji update repositories                                                                                                                                                                  |
| - MaMuT                                            | This paper (f) and Tinevez, Pietzsch, et al. | Fiji update repositories and <a href="https://github.com/mhdominguez/MaMuT">https://github.com/mhdominguez/MaMuT</a>                                                                                              |
| MaMuT script library                               | This paper (h)                               | <a href="https://github.com/mhdominguez/MaMuTLibrary">https://github.com/mhdominguez/MaMuTLibrary</a>                                                                                                             |

1128 **Supplemental Video Titles**

1129

1130 Video S1: Spatiotemporal assembly of mesoderm, related to Figure 2

1131 Video S2: Birth of the Smarcd3-F6 cardiac progenitors, related to Figure 3

1132 Video S3: Mesenchymal-epithelial transition of the cardiac crescent, related to Figure 4

1133 Video S4: JCF motility and heart field morphogenesis, related to Figure 5

1134 Video S5: Early heart tube formation, related to Figure 6

1135 Video S6: Mesoderm assembly in *Mesp1* mutants, related to Figure 7

1136 Video S7: Anaglyph 3d movies of early cardiac development, related to Figure S7

## 1137 **References**

- 1138 1. de la Cruz MV, Castillo MM, Villavicencio L, Valencia A, Moreno-Rodriguez RA. Primitive  
1139 interventricular septum, its primordium, and its contribution in the definitive interventricular  
1140 septum: in vivo labelling study in the chick embryo heart. *Anat Rec.* 1997;247: 512–520.  
1141 doi:10.1002/(SICI)1097-0185(199704)247:4<512::AID-AR10>3.0.CO;2-S
- 1142 2. Cui C, Chevront TJ, Lansford RD, Moreno-Rodriguez RA, Schultheiss TM, Rongish BJ. Dynamic  
1143 positional fate map of the primary heart-forming region. *Dev Biol.* 2009;332: 212–222.  
1144 doi:10.1016/j.ydbio.2009.05.570
- 1145 3. Evans SM, Yelon D, Conlon FL, Kirby ML. Myocardial Lineage Development. *Circ Res.* 2010;107:  
1146 1428–1444. doi:10.1161/CIRCRESAHA.110.227405
- 1147 4. Kelly RG, Buckingham ME, Moorman AF. Heart fields and cardiac morphogenesis. *Cold Spring*  
1148 *Harb Perspect Med.* 2014;4. doi:10.1101/cshperspect.a015750
- 1149 5. Meilhac SM, Esner M, Kelly RG, Nicolas J-F, Buckingham ME. The clonal origin of myocardial  
1150 cells in different regions of the embryonic mouse heart. *Dev Cell.* 2004;6: 685–698.
- 1151 6. Devine WP, Wythe JD, George M, Koshiba-Takeuchi K, Bruneau BG. Early patterning and  
1152 specification of cardiac progenitors in gastrulating mesoderm. *eLife.* 2014;3.  
1153 doi:10.7554/eLife.03848
- 1154 7. Lescroart F, Chabab S, Lin X, Rulands S, Paulissen C, Rodolosse A, et al. Early lineage  
1155 restriction in temporally distinct populations of *Mesp1* progenitors during mammalian heart  
1156 development. *Nat Cell Biol.* 2014;16: 829–840. doi:10.1038/ncb3024
- 1157 8. Saga Y, Miyagawa-Tomita S, Takagi A, Kitajima S, Miyazaki J i, Inoue T. *MesP1* is expressed in  
1158 the heart precursor cells and required for the formation of a single heart tube. *Dev Camb Engl.*  
1159 1999;126: 3437–3447.
- 1160 9. Tyser RCV, Ibarra-Soria X, McDole K, Arcot Jayaram S, Godwin J, van den Brand TAH, et al.  
1161 Characterization of a common progenitor pool of the epicardium and myocardium. *Science.*  
1162 2021;371: eabb2986. doi:10.1126/science.abb2986
- 1163 10. Zhang Q, Carlin D, Zhu F, Cattaneo P, Ideker T, Evans SM, et al. Unveiling Complexity and  
1164 Multipotentiality of Early Heart Fields. *Circ Res.* 2021;129: 474–487.  
1165 doi:10.1161/CIRCRESAHA.121.318943
- 1166 11. Später D, Abramczuk MK, Buac K, Zangi L, Stachel MW, Clarke J, et al. A *HCN4*+  
1167 cardiomyogenic progenitor derived from the first heart field and human pluripotent stem cells. *Nat*  
1168 *Cell Biol.* 2013;15: 1098–1106. doi:10.1038/ncb2824
- 1169 12. Cai C-L, Liang X, Shi Y, Chu P-H, Pfaff SL, Chen J, et al. *Isl1* Identifies a Cardiac Progenitor  
1170 Population that Proliferates Prior to Differentiation and Contributes a Majority of Cells to the  
1171 Heart. *Dev Cell.* 2003;5: 877–889.
- 1172 13. Kelly RG, Brown NA, Buckingham ME. The arterial pole of the mouse heart forms from *Fgf10*-  
1173 expressing cells in pharyngeal mesoderm. *Dev Cell.* 2001;1: 435–440.

- 1174 14. Ivanovitch K, Soro-Barrio P, Chakravarty P, Jones RA, Bell DM, Mousavy Gharavy SN, et al.  
1175 Ventricular, atrial, and outflow tract heart progenitors arise from spatially and molecularly distinct  
1176 regions of the primitive streak. *PLoS Biol.* 2021;19: e3001200. doi:10.1371/journal.pbio.3001200
- 1177 15. Abu-Issa R, Kirby ML. Patterning of the heart field in the chick. *Dev Biol.* 2008;319: 223–233.  
1178 doi:10.1016/j.ydbio.2008.04.014
- 1179 16. Aleksandrova A, Czirok A, Kosa E, Galkin O, Chevront TJ, Rongish BJ. The endoderm and  
1180 myocardium join forces to drive early heart tube assembly. *Dev Biol.* 2015;404: 40–54.  
1181 doi:10.1016/j.ydbio.2015.04.016
- 1182 17. Kidokoro H, Yonei-Tamura S, Tamura K, Schoenwolf GC, Saijoh Y. The heart tube forms and  
1183 elongates through dynamic cell rearrangement coordinated with foregut extension. *Dev Camb*  
1184 *Engl.* 2018;145. doi:10.1242/dev.152488
- 1185 18. Aguilera-Castrejon A, Oldak B, Shani T, Ghanem N, Itzkovich C, Slomovich S, et al. Ex utero  
1186 mouse embryogenesis from pre-gastrulation to late organogenesis. *Nature.* 2021;593: 119–124.  
1187 doi:10.1038/s41586-021-03416-3
- 1188 19. Glanville-Jones HC, Woo N, Arkell RM. Successful whole embryo culture with commercially  
1189 available reagents. *Int J Dev Biol.* 2013;57: 61–67. doi:10.1387/ijdb.120098ra
- 1190 20. Harrison SE, Sozen B, Christodoulou N, Kyprianou C, Zernicka-Goetz M. Assembly of embryonic  
1191 and extraembryonic stem cells to mimic embryogenesis in vitro. *Science.* 2017;356.  
1192 doi:10.1126/science.aal1810
- 1193 21. Tam PP. Postimplantation mouse development: whole embryo culture and micro-manipulation. *Int*  
1194 *J Dev Biol.* 1998;42: 895–902.
- 1195 22. Saykali B, Mathiah N, Nahaboo W, Racu M-L, Hammou L, Defrance M, et al. Distinct mesoderm  
1196 migration phenotypes in extra-embryonic and embryonic regions of the early mouse embryo.  
1197 *eLife.* 2019;8: e42434. doi:10.7554/eLife.42434
- 1198 23. Ivanovitch K, Temiño S, Torres M. Live imaging of heart tube development in mouse reveals  
1199 alternating phases of cardiac differentiation and morphogenesis. *eLife.* 2017;6.  
1200 doi:10.7554/eLife.30668
- 1201 24. Falk HJ, Tomita T, Mönke G, McDole K, Aulehla A. Imaging the onset of oscillatory signaling  
1202 dynamics during mouse embryo gastrulation. *Dev Camb Engl.* 2022;149: dev200083.  
1203 doi:10.1242/dev.200083
- 1204 25. Ichikawa T, Nakazato K, Keller PJ, Kajiura-Kobayashi H, Stelzer EHK, Mochizuki A, et al. Live  
1205 imaging of whole mouse embryos during gastrulation: migration analyses of epiblast and  
1206 mesodermal cells. *PLoS One.* 2013;8: e64506. doi:10.1371/journal.pone.0064506
- 1207 26. Udan RS, Piazza VG, Hsu C-W, Hadjantonakis A-K, Dickinson ME. Quantitative imaging of cell  
1208 dynamics in mouse embryos using light-sheet microscopy. *Dev Camb Engl.* 2014;141: 4406–  
1209 4414. doi:10.1242/dev.111021
- 1210 27. Yue Y, Zong W, Li X, Li J, Zhang Y, Wu R, et al. Long-term, in toto live imaging of cardiomyocyte  
1211 behaviour during mouse ventricle chamber formation at single-cell resolution. *Nat Cell Biol.*  
1212 2020;22: 332–340. doi:10.1038/s41556-020-0475-2

- 1213 28. Hörl D, Rojas Rusak F, Preusser F, Tillberg P, Randel N, Chhetri RK, et al. BigStitcher:  
1214 reconstructing high-resolution image datasets of cleared and expanded samples. *Nat Methods*.  
1215 2019;16: 870–874. doi:10.1038/s41592-019-0501-0
- 1216 29. McDole K, Guignard L, Amat F, Berger A, Malandain G, Royer LA, et al. In Toto Imaging and  
1217 Reconstruction of Post-Implantation Mouse Development at the Single-Cell Level. *Cell*. 2018;175:  
1218 859-876.e33. doi:10.1016/j.cell.2018.09.031
- 1219 30. Wolff C, Tinevez J-Y, Pietzsch T, Stamatakis E, Harich B, Guignard L, et al. Multi-view light-sheet  
1220 imaging and tracking with the MaMuT software reveals the cell lineage of a direct developing  
1221 arthropod limb. *eLife*. 2018;7. doi:10.7554/eLife.34410
- 1222 31. Hansen PC, Nagy JG, O’Leary DP. *Deblurring Images: Matrices, Spectra, and Filtering*. SIAM;  
1223 2006.
- 1224 32. Preibisch S, Amat F, Stamatakis E, Sarov M, Singer RH, Myers E, et al. Efficient Bayesian-based  
1225 multiview deconvolution. *Nat Methods*. 2014;11: 645–648. doi:10.1038/nmeth.2929
- 1226 33. Wendykier P, Nagy JG. Large-Scale Image Deblurring in Java. In: Bubak M, van Albada GD,  
1227 Dongarra J, Sliot PMA, editors. *Computational Science – ICCS 2008*. Berlin, Heidelberg:  
1228 Springer; 2008. pp. 721–730. doi:10.1007/978-3-540-69384-0\_77
- 1229 34. Schindelin J, Arganda-Carreras I, Frise E, Kaynig V, Longair M, Pietzsch T, et al. Fiji: an open-  
1230 source platform for biological-image analysis. *Nat Methods*. 2012;9: 676–682.  
1231 doi:10.1038/nmeth.2019
- 1232 35. Probst S, Sagar, Tomic J, Schwan C, Grün D, Arnold SJ. Spatiotemporal sequence of mesoderm  
1233 and endoderm lineage segregation during mouse gastrulation. *Development*. 2021;148:  
1234 dev193789. doi:10.1242/dev.193789
- 1235 36. Lescroart F, Wang X, Lin X, Swedlund B, Gargouri S, Sánchez-Dànes A, et al. Defining the  
1236 earliest step of cardiovascular lineage segregation by single-cell RNA-seq. *Science*. 2018;359:  
1237 1177–1181. doi:10.1126/science.aao4174
- 1238 37. Pei D, Shu X, Gassama-Diagne A, Thiery JP. Mesenchymal-epithelial transition in development  
1239 and reprogramming. *Nat Cell Biol*. 2019;21: 44–53. doi:10.1038/s41556-018-0195-z
- 1240 38. Schlueter J, Mikawa T. Body Cavity Development Is Guided by Morphogen Transfer between  
1241 Germ Layers. *Cell Rep*. 2018;24: 1456–1463. doi:10.1016/j.celrep.2018.07.015
- 1242 39. de Soysa TY, Ranade SS, Okawa S, Ravichandran S, Huang Y, Salunga HT, et al. Single-cell  
1243 analysis of cardiogenesis reveals basis for organ-level developmental defects. *Nature*. 2019;572:  
1244 120–124. doi:10.1038/s41586-019-1414-x
- 1245 40. Cortes C, Francou A, De Bono C, Kelly RG. Epithelial Properties of the Second Heart Field. *Circ*  
1246 *Res*. 2018;122: 142–154. doi:10.1161/CIRCRESAHA.117.310838
- 1247 41. Jia G, Preussner J, Chen X, Guenther S, Yuan X, Yekelchik M, et al. Single cell RNA-seq and  
1248 ATAC-seq analysis of cardiac progenitor cell transition states and lineage settlement. *Nat*  
1249 *Commun*. 2018;9: 4877. doi:10.1038/s41467-018-07307-6

- 1250 42. Quaranta R, Fell J, Rühle F, Rao J, Piccini I, Araúzo-Bravo MJ, et al. Revised roles of ISL1 in a  
1251 hES cell-based model of human heart chamber specification. *eLife*. 2018;7.  
1252 doi:10.7554/eLife.31706
- 1253 43. Ajima R, Sakakibara Y, Sakurai-Yamatani N, Muraoka M, Saga Y. Formal proof of the requirement  
1254 of MESP1 and MESP2 in mesoderm specification and their transcriptional control via specific  
1255 enhancers in mice. *Dev Camb Engl*. 2021;148: dev194613. doi:10.1242/dev.194613
- 1256 44. Chiapparo G, Lin X, Lescroart F, Chabab S, Paulissen C, Pitisci L, et al. *Mesp1* controls the  
1257 speed, polarity, and directionality of cardiovascular progenitor migration. *J Cell Biol*. 2016;213:  
1258 463–477. doi:10.1083/jcb.201505082
- 1259 45. Keller R. Cell migration during gastrulation. *Curr Opin Cell Biol*. 2005;17: 533–541.  
1260 doi:10.1016/j.ceb.2005.08.006
- 1261 46. Bénazéraf B, Francois P, Baker RE, Denans N, Little CD, Pourquié O. A random cell motility  
1262 gradient downstream of FGF controls elongation of an amniote embryo. *Nature*. 2010;466: 248–  
1263 252. doi:10.1038/nature09151
- 1264 47. Regev I, Guevorkian K, Gupta A, Pourquié O, Mahadevan L. Rectified random cell motility as a  
1265 mechanism for embryo elongation. *Dev Camb Engl*. 2022;149: dev199423.  
1266 doi:10.1242/dev.199423
- 1267 48. Fulton T, Trivedi V, Attardi A, Anlas K, Dingare C, Arias AM, et al. Axis Specification in Zebrafish  
1268 Is Robust to Cell Mixing and Reveals a Regulation of Pattern Formation by Morphogenesis. *Curr*  
1269 *Biol CB*. 2020;30: 2984-2994.e3. doi:10.1016/j.cub.2020.05.048
- 1270 49. Ferretti E, Hadjantonakis A-K. Mesoderm specification and diversification: from single cells to  
1271 emergent tissues. *Curr Opin Cell Biol*. 2019;61: 110–116. doi:10.1016/j.ceb.2019.07.012
- 1272 50. Shahbazi MN, Zernicka-Goetz M. Deconstructing and reconstructing the mouse and human early  
1273 embryo. *Nat Cell Biol*. 2018;20: 878–887. doi:10.1038/s41556-018-0144-x
- 1274 51. Donà E, Barry JD, Valentin G, Quirin C, Khmelinskii A, Kunze A, et al. Directional tissue migration  
1275 through a self-generated chemokine gradient. *Nature*. 2013;503: 285–289.  
1276 doi:10.1038/nature12635
- 1277 52. Dodou E, Verzi MP, Anderson JP, Xu S-M, Black BL. *Mef2c* is a direct transcriptional target of  
1278 ISL1 and GATA factors in the anterior heart field during mouse embryonic development.  
1279 *Development*. 2004;131: 3931–3942. doi:10.1242/dev.01256
- 1280 53. Bedzhov I, Zernicka-Goetz M. Self-Organizing Properties of Mouse Pluripotent Cells Initiate  
1281 Morphogenesis upon Implantation. *Cell*. 2014;156: 1032–1044. doi:10.1016/j.cell.2014.01.023
- 1282 54. Tyser RC, Miranda AM, Chen C-M, Davidson SM, Srinivas S, Riley PR. Calcium handling  
1283 precedes cardiac differentiation to initiate the first heartbeat. *eLife*. 2016;5.  
1284 doi:10.7554/eLife.17113
- 1285 55. Cho CH, Kim SS, Jeong MJ, Lee CO, Shin HS. The Na<sup>+</sup>-Ca<sup>2+</sup> exchanger is essential for  
1286 embryonic heart development in mice. *Mol Cells*. 2000;10: 712–722. doi:10.1007/s10059-000-  
1287 0712-2

- 1288 56. Koushik SV, Wang J, Rogers R, Moskophidis D, Lambert NA, Creazzo TL, et al. Targeted  
1289 inactivation of the sodium-calcium exchanger (Ncx1) results in the lack of a heartbeat and  
1290 abnormal myofibrillar organization. *FASEB J Off Publ Fed Am Soc Exp Biol.* 2001;15: 1209–1211.  
1291 doi:10.1096/fj.00-0696fje
- 1292 57. Lowe DG. Distinctive Image Features from Scale-Invariant Keypoints. *Int J Comput Vis.* 2004;60:  
1293 91–110. doi:10.1023/B:VISI.0000029664.99615.94
- 1294 58. Perbellini F, Liu AKL, Watson SA, Bardi I, Rothery SM, Terracciano CM. Free-of-Acrylamide SDS-  
1295 based Tissue Clearing (FASTClear) for three dimensional visualization of myocardial tissue. *Sci*  
1296 *Rep.* 2017;7: 1–9. doi:10.1038/s41598-017-05406-w
- 1297 59. Hao Y, Hao S, Andersen-Nissen E, Mauck WM, Zheng S, Butler A, et al. Integrated analysis of  
1298 multimodal single-cell data. *Cell.* 2021;184: 3573-3587.e29. doi:10.1016/j.cell.2021.04.048
- 1299 60. Walter W, Sánchez-Cabo F, Ricote M. GOplot: an R package for visually combining expression  
1300 data with functional analysis. *Bioinforma Oxf Engl.* 2015;31: 2912–2914.  
1301 doi:10.1093/bioinformatics/btv300
- 1302 61. Amat F, Lemon W, Mossing DP, McDole K, Wan Y, Branson K, et al. Fast, accurate reconstruction  
1303 of cell lineages from large-scale fluorescence microscopy data. *Nat Methods.* 2014;11: 951–958.  
1304 doi:10.1038/nmeth.3036
- 1305 62. Tinevez J-Y, Perry N, Schindelin J, Hoopes GM, Reynolds GD, Laplantine E, et al. TrackMate: An  
1306 open and extensible platform for single-particle tracking. *Methods San Diego Calif.* 2017;115: 80–  
1307 90. doi:10.1016/j.ymeth.2016.09.016
- 1308
